# Supplementary material
Source: PubMed Central journal article supplement (PMC7490689)
Supplement: 41396_2020_698_MOESM3_ESM.pdf [file 41396_2020_698_MOESM3_ESM.pdf]

|             |        |   |       |   |   |       |      |       |   |       |        |         |         |         |        |         |        |        |
|-------------|--------|---|-------|---|---|-------|------|-------|---|-------|--------|---------|---------|---------|--------|---------|--------|--------|
| TVAG_034660 | K02929 | 0 | 0     | 0 | 0 | 0     | 0    | 0     | 0 | 0     | 0      | 1355.04 | 120.02  | 732.82  | 0      | 0       | 0      | RPL44  |
| TVAG_064640 | K02932 | 0 | 0     | 0 | 0 | 0     | 0    | 7.93  | 0 | 0     | 10.68  | 2338.68 | 2198.73 | 1500.13 | 0      | 0       | 0      | RPL5   |
| TVAG_054130 | K02937 | 0 | 0     | 0 | 0 | 0     | 0    | 0     | 0 | 0     | 0      | 484.24  | 223.11  | 188.56  | 0      | 0       | 0      | RPL7   |
| TVAG_009840 | K02938 | 0 | 0     | 0 | 0 | 0     | 0    | 0     | 0 | 0     | 0      | 1254.36 | 488.97  | 588.12  | 0      | 0       | 0      | RPL7A  |
| TVAG_054500 | K02940 | 0 | 0     | 0 | 0 | 0     | 0    | 0     | 0 | 0     | 0      | 263.5   | 502.65  | 279.31  | 0      | 0       | 0      | RPL9   |
| TVAG_051160 | K02941 | 0 | 0     | 0 | 0 | 0     | 0    | 0     | 0 | 0     | 0      | 470.75  | 383.72  | 297.44  | 0      | 0       | 0      | RPLP0  |
| TVAG_020470 | K02942 | 0 | 25.33 | 0 | 0 | 0     | 0    | 0     | 0 | 0     | 0      | 489.09  | 307.71  | 168.45  | 0      | 0       | 0      | RPLP1  |
| TVAG_113950 | K02949 | 0 | 0     | 0 | 0 | 0     | 0    | 0     | 0 | 0     | 0      | 1112.36 | 501.66  | 438.07  | 0      | 0       | 0      | RPS11  |
| TVAG_010250 | K02951 | 0 | 0     | 0 | 0 | 0     | 0    | 0     | 0 | 0     | 0      | 979.31  | 165.13  | 256.49  | 0      | 0       | 0      | RPS12  |
| TVAG_066760 | K02953 | 0 | 0     | 0 | 0 | 0     | 0    | 0     | 0 | 0     | 0      | 2696.24 | 1481.96 | 809.09  | 0      | 0       | 0      | RPS13  |
| TVAG_117480 | K02955 | 0 | 0     | 0 | 0 | 0     | 0    | 0     | 0 | 0     | 0      | 1311.14 | 901.57  | 371.41  | 0      | 0       | 0      | RPS14  |
| TVAG_055940 | K02958 | 0 | 0     | 0 | 0 | 0     | 0    | 0     | 0 | 0     | 26.74  | 1001.57 | 1397.95 | 574.16  | 0      | 0       | 0      | RPS15  |
| TVAG_006250 | K02957 | 0 | 0     | 0 | 0 | 0     | 0    | 0     | 0 | 0     | 0      | 719.54  | 222.16  | 188.63  | 0      | 0       | 0      | RPS15A |
| TVAG_020040 | K02960 | 0 | 0     | 0 | 0 | 0     | 0    | 0     | 0 | 0     | 13.9   | 568.31  | 346.13  | 296.45  | 0      | 0       | 0      | RPS16  |
| TVAG_040820 | K02962 | 0 | 0     | 0 | 0 | 0     | 0    | 0     | 0 | 0     | 0      | 1556.08 | 840.77  | 820.57  | 0      | 0       | 0      | RPS17  |
| TVAG_352520 | K02966 | 0 | 0     | 0 | 0 | 0     | 0    | 0     | 0 | 0     | 0      | 1073.86 | 376.15  | 493.35  | 0      | 0       | 0      | RPS19  |
| TVAG_071920 | K02973 | 0 | 0     | 0 | 0 | 18.16 | 0    | 0     | 0 | 0     | 0      | 2229.66 | 1375.37 | 679.39  | 0      | 0       | 0      | RPS23  |
| TVAG_072940 | K02974 | 0 | 0     | 0 | 0 | 0     | 0    | 0     | 0 | 0     | 128.55 | 3669.61 | 2947.58 | 1814.78 | 0      | 0       | 0      | RPS24  |
| TVAG_031870 | K02977 | 0 | 0     | 0 | 0 | 0     | 0    | 0     | 0 | 0     | 0      | 92.09   | 52.64   | 20.48   | 0      | 0       | 0      | RPS27A |
| TVAG_106800 | K02985 | 0 | 0     | 0 | 0 | 0     | 0    | 0     | 0 | 0     | 0      | 653.91  | 667.78  | 283.28  | 0      | 0       | 0      | RPS3   |
| TVAG_106800 | K02985 | 0 | 0     | 0 | 0 | 0     | 0    | 0     | 0 | 0     | 0      | 525.72  | 369.98  | 182.65  | 0      | 0       | 0      | RPS3   |
| TVAG_047460 | K02984 | 0 | 0     | 0 | 0 | 0     | 4.32 | 0     | 0 | 0     | 12.02  | 2955.24 | 2447.45 | 2168.05 | 0      | 0       | 0      | RPS3A  |
| TVAG_163180 | K02989 | 0 | 0     | 0 | 0 | 0     | 0    | 0     | 0 | 0     | 16.37  | 2306.49 | 1579.93 | 1258.75 | 0      | 0       | 0      | RPS5   |
| TVAG_033990 | K02991 | 0 | 0     | 0 | 0 | 0     | 0    | 0     | 0 | 0     | 0      | 1517.57 | 1234.22 | 1508.94 | 0      | 0       | 0      | RPS6   |
| TVAG_033990 | K02991 | 0 | 0     | 0 | 0 | 0     | 0    | 0     | 0 | 0     | 0      | 1249.63 | 1611.67 | 1445.83 | 0      | 0       | 0      | RPS6   |
| TVAG_033990 | K02991 | 0 | 0     | 0 | 0 | 0     | 0    | 11.33 | 0 | 0     | 15.11  | 1084.43 | 749.85  | 559.87  | 0      | 0       | 0      | RPS6   |
| TVAG_010560 | K02997 | 0 | 0     | 0 | 0 | 0     | 0    | 0     | 0 | 0     | 14.88  | 971.15  | 766.33  | 613.94  | 0      | 0       | 0      | RPS9   |
| TVAG_240050 | K02998 | 0 | 0     | 0 | 0 | 0     | 0    | 0     | 0 | 0     | 0      | 340.25  | 252.33  | 224.71  | 0      | 0       | 0      | RPSA   |
| TVAG_074480 | K02865 | 0 | 0     | 0 | 0 | 0     | 0    | 0     | 0 | 0     | 0      | 0       | 0       | 100.38  | 484.25 | 845.45  | RPL10A |        |
| TVAG_044560 | K02868 | 0 | 0     | 0 | 0 | 0     | 0    | 0     | 0 | 0     | 0      | 102.26  | 0       | 102.26  | 136.03 | 313.49  | RPL11  |        |
| TVAG_044560 | K02868 | 0 | 0     | 0 | 0 | 0     | 0    | 0     | 0 | 0     | 0      | 0       | 0       | 171     | 218.8  | 178.72  | RPL11  |        |
| TVAG_014160 | K02870 | 0 | 0     | 0 | 0 | 0     | 0    | 0     | 0 | 0     | 0      | 0       | 0       | 24.43   | 98.32  | 603.09  | RPL12  |        |
| TVAG_112230 | K02873 | 0 | 0     | 0 | 0 | 0     | 0    | 0     | 0 | 0     | 0      | 0       | 0       | 297.03  | 372.12 | 451.18  | RPL13  |        |
| TVAG_026230 | K02872 | 0 | 0     | 0 | 0 | 0     | 0    | 0     | 0 | 0     | 0      | 0       | 0       | 177.29  | 192.85 | 518.72  | RPL13A |        |
| TVAG_026460 | K02875 | 0 | 0     | 0 | 0 | 0     | 0    | 0     | 0 | 0     | 0      | 0       | 0       | 53.91   | 107.96 | 401.41  | RPL14  |        |
| TVAG_083260 | K02880 | 0 | 0     | 0 | 0 | 0     | 0    | 0     | 0 | 27.55 | 0      | 0       | 0       | 156.85  | 172.39 | 633.66  | RPL17  |        |
| TVAG_121100 | K02883 | 0 | 0     | 0 | 0 | 0     | 0    | 0     | 0 | 0     | 0      | 0       | 0       | 194.46  | 139.77 | 369.37  | RPL18  |        |
| TVAG_263760 | K02882 | 0 | 0     | 0 | 0 | 0     | 0    | 0     | 0 | 0     | 0      | 0       | 0       | 59.83   | 174.71 | 564.51  | RPL18A |        |
| TVAG_006170 | K02885 | 0 | 0     | 0 | 0 | 0     | 0    | 0     | 0 | 0     | 0      | 0       | 0       | 140.38  | 182.01 | 581.48  | RPL19  |        |
| TVAG_057020 | K02891 | 0 | 0     | 0 | 0 | 0     | 0    | 0     | 0 | 0     | 0      | 0       | 0       | 0       | 0      | 0       | RPL22  |        |
| TVAG_015900 | K02894 | 0 | 0     | 0 | 0 | 0     | 0    | 0     | 0 | 0     | 0      | 0       | 0       | 52.41   | 137.59 | 186.44  | RPL23  |        |
| TVAG_101690 | K02896 | 0 | 0     | 0 | 0 | 0     | 0    | 0     | 0 | 0     | 0      | 0       | 0       | 37.53   | 0      | 139.01  | RPL24  |        |
| TVAG_038050 | K02898 | 0 | 0     | 0 | 0 | 0     | 0    | 0     | 0 | 0     | 0      | 0       | 0       | 107.32  | 230.32 | 711.73  | RPL26  |        |
| TVAG_140290 | K02901 | 0 | 0     | 0 | 0 | 0     | 0    | 0     | 0 | 0     | 0      | 0       | 0       | 148.54  | 142.72 | 156     | RPL27  |        |
| TVAG_121550 | K02900 | 0 | 0     | 0 | 0 | 0     | 0    | 0     | 0 | 0     | 0      | 0       | 0       | 258.56  | 236.59 | 1104.64 | RPL27A |        |
| TVAG_013060 | K02925 | 0 | 0     | 0 | 0 | 0     | 0    | 0     | 0 | 0     | 0      | 0       | 0       | 97.64   | 203.39 | 210.28  | RPL3   |        |
| TVAG_056490 | K02910 | 0 | 0     | 0 | 0 | 0     | 0    | 0     | 0 | 0     | 0      | 0       | 0       | 15.11   | 40.06  | 26.05   | RPL31  |        |
| TVAG_055930 | K02932 | 0 | 0     | 0 | 0 | 0     | 0    | 0     | 0 | 0     | 0      | 0       | 0       | 251.83  | 144.97 | 415.36  | RPL32  |        |
| TVAG_158830 | K02918 | 0 | 0     | 0 | 0 | 0     | 0    | 0     | 0 | 0     | 0      | 0       | 0       | 26.34   | 75.44  | 232.95  | RPL35  |        |
| TVAG_020530 | K02920 | 0 | 0     | 0 | 0 | 0     | 0    | 0     | 0 | 0     | 0      | 0       | 0       | 0       | 98.92  | 413.14  | RPL36  |        |
| TVAG_128790 | K02930 | 0 | 0     | 0 | 0 | 0     | 0    | 0     | 0 | 0     | 0      | 0       | 0       | 145.35  | 73.65  | 78.82   | RPL4   |        |
| TVAG_064640 | K02932 | 0 | 0     | 0 | 0 | 0     | 0    | 0     | 0 | 0     | 0      | 0       | 0       | 159.82  | 282.29 | 534.06  | RPL5   |        |
| TVAG_099510 | K02934 | 0 | 0     | 0 | 0 | 0     | 0    | 0     | 0 | 0     | 0      | 0       | 0       | 225.25  | 46.53  | 468.86  | RPL6   |        |
| TVAG_054130 | K02937 | 0 | 0     | 0 | 0 | 0     | 0    | 0     | 0 | 0     | 0      | 0       | 0       | 98.71   | 226.2  | 533.01  | RPL7   |        |
| TVAG_009840 | K02936 | 0 | 0     | 0 | 0 | 0     | 0    | 0     | 0 | 0     | 0      | 0       | 0       | 102.84  | 561.7  | 801.83  | RPL7A  |        |
| TVAG_005910 | K02938 | 0 | 0     | 0 | 0 | 0     | 0    | 0     | 0 | 0     | 0      | 0       | 0       | 234.81  | 701.08 | 998.25  | RPL8   |        |
| TVAG_054500 | K02940 | 0 | 0     | 0 | 0 | 0     | 0    | 0     | 0 | 0     | 0      | 0       | 0       | 142.82  | 259.14 | 739.53  | RPL9   |        |
| TVAG_051160 | K02941 | 0 | 0     | 0 | 0 | 0     | 0    | 0     | 0 | 0     | 0      | 0       | 0       | 133.5   | 575.61 | 1166.68 | RPLP0  |        |
| TVAG_020470 | K02942 | 0 | 0     | 0 | 0 | 0     | 0    | 0     | 0 | 0     | 0      | 0       | 0       | 67.16   | 56.88  | 296.01  | RPLP1  |        |
| TVAG_329340 | K02947 | 0 | 0     | 0 | 0 | 0     | 0    | 0     | 0 | 0     | 0      | 0       | 0       | 116.79  | 162.06 | 924.92  | RPS10  |        |
| TVAG_010250 | K02951 | 0 | 0     | 0 | 0 | 0     | 0    | 0     | 0 | 0     | 0      | 0       | 0       | 85.42   | 23.66  | 295.6   | RPS12  |        |
| TVAG_066760 | K02953 | 0 | 0     | 0 | 0 | 0     | 0    | 0     | 0 | 0     | 0      | 0       | 0       | 263.87  | 152.82 | 441.69  | RPS13  |        |
| TVAG_117480 | K02955 | 0 | 0     | 0 | 0 | 0     | 0    | 0     | 0 | 0     | 0      | 0       | 0       | 21.46   | 161.28 | 596.23  | RPS14  |        |
| TVAG_020040 | K02960 | 0 | 0     | 0 | 0 | 0     | 0    | 0     | 0 | 0     | 0      | 0       | 0       | 69.98   | 107.51 | 315.19  | RPS16  |        |
| TVAG_040820 | K02962 | 0 | 0     | 0 | 0 | 0     | 0    | 0     | 0 | 0     | 0      | 0       | 0       | 32.13   | 127.38 | 402.82  | RPS17  |        |
| TVAG_020480 | K02964 | 0 | 0     | 0 | 0 | 0     | 0    | 0     | 0 | 0     | 0      | 0       | 0       | 46.46   | 9.7    | 35.72   | RPS18  |        |
| TVAG_352520 | K02966 | 0 | 0     | 0 | 0 | 0     | 0    | 0     | 0 | 0     | 0      | 0       | 0       | 182.68  | 152.82 | 671.76  | RPS19  |        |
| TVAG_086300 | K02969 | 0 | 0     | 0 | 0 | 0     | 0    | 0     | 0 | 0     | 0      | 0       | 0       | 117.63  | 21.89  | 326.41  | RPS20  |        |
| TVAG_106800 | K02985 | 0 | 0     | 0 | 0 | 0     | 0    | 0     | 0 | 0     | 0      | 0       | 0       | 70.55   | 213.72 | 454.03  | RPS3   |        |
| TVAG_017460 | K02984 | 0 | 0     | 0 | 0 | 0     | 0    | 0     | 0 | 0     | 0      | 0       | 0       | 140.97  | 756.60 | 1386.35 | RPS3A  |        |
| TVAG_163180 | K02989 | 0 | 0     | 0 | 0 | 0     | 0    | 0     | 0 | 0     | 0      | 0       | 0       | 124.89  | 241.44 | 1069.53 | RPS5   |        |
| TVAG_143030 | K02993 | 0 | 0     | 0 | 0 | 0     | 0    | 0     | 0 | 0     | 0      | 0       | 0       | 132.31  | 86.72  | 524.15  | RPS7   |        |
| TVAG_010560 | K02997 | 0 | 0     | 0 | 0 | 0     | 0    | 0     | 0 | 0     | 0      | 0       | 0       | 108.93  | 201.64 | 282.92  | RPS9   |        |
| TVAG_240050 | K02998 | 0 | 0     | 0 | 0 | 0     | 0    | 0     | 0 | 15.59 | 0      | 0       | 0       | 146.2   | 229.11 | 837.83  | RPSA   |        |
