# Supplementary material
Source: PubMed Central journal article supplement (PMC7490689)
Supplement: 41396_2020_698_MOESM4_ESM.pdf [file 41396_2020_698_MOESM4_ESM.pdf]

**Supplementary Table 2.** Statistics of the transcriptome assembly

|                                    | Number of paired-end reads* <sup>1</sup> |            |            | Transcriptome assembly* <sup>2</sup> |                          |            |
|------------------------------------|------------------------------------------|------------|------------|--------------------------------------|--------------------------|------------|
|                                    | Library 1                                | Library 2  | Library 3  | N50                                  | No. contig* <sup>3</sup> | Total base |
| <i>Pseudotriconympha grassii</i>   | 23,169,867                               | 20,874,582 | 30,215,345 | 1,175                                | 39,825                   | 35,619,360 |
| <i>Holomastigotoides hartmanni</i> | 25,488,617                               | 26,149,361 | 28,319,743 | 837                                  | 108,262                  | 76,841,851 |
| <i>Holomastigotoides minor</i>     | 28,291,610                               | 49,604,672 | 27,702,408 | 1,018                                | 70,088                   | 58,009,961 |
| <i>Cononympha leidyi</i>           | 40,348,124                               | 28,828,635 | 33,194,456 | 1,213                                | 51,266                   | 47,901,578 |

\*<sup>1</sup> The number of paired-reads after removal of adapter and quality filtering.

\*<sup>2</sup> These statistics are calculated after removal of contamination

\*<sup>3</sup> Contigs longer than  $\geq 300$ bp are shown
