# Supplementary material
Source: PubMed Central journal article supplement (PMC7490689)
Supplement: 41396_2020_698_MOESM5_ESM.pdf [file 41396_2020_698_MOESM5_ESM.pdf]

Supplementary Table 3. BUSCO proteins found in the single-cell transcriptomes

Amino acids sequences are available at Dryad digital repository (<https://doi.org/10.5061/dryad.05.qfttf04>)***a Pseudotrichonympha grassii***

| Protein ID                   | EOG         |
|------------------------------|-------------|
| TRINITY_DN13176_c0_g1_i1.p1  | EOG093700N7 |
| TRINITY_DN16221_c0_g1_i2.p1  | EOG0937017X |
| TRINITY_DN6835_c0_g1_i1.p1   | EOG0937018Z |
| TRINITY_DN15974_c0_g1_i1.p1  | EOG093701EE |
| TRINITY_DN15974_c0_g2_i1.p1  | EOG093701EE |
| TRINITY_DN17399_c0_g1_i2.p1  | EOG093701S0 |
| TRINITY_DN7614_c0_g1_i2.p1   | EOG093701S0 |
| TRINITY_DN15682_c0_g1_i1.p1  | EOG093701SQ |
| TRINITY_DN10928_c0_g1_i1.p1  | EOG093701V7 |
| TRINITY_DN10429_c0_g1_i1.p1  | EOG0937029K |
| TRINITY_DN13672_c2_g7_i1.p1  | EOG093702AT |
| TRINITY_DN7535_c0_g1_i1.p1   | EOG093702DP |
| TRINITY_DN14590_c1_g1_i1.p1  | EOG093702MJ |
| TRINITY_DN11831_c0_g1_i1.p1  | EOG093702PE |
| TRINITY_DN14184_c0_g1_i1.p1  | EOG0937033T |
| TRINITY_DN10143_c0_g1_i1.p1  | EOG0937033T |
| TRINITY_DN16499_c0_g1_i1.p1  | EOG093703C8 |
| TRINITY_DN18995_c0_g1_i1.p1  | EOG093703DY |
| TRINITY_DN15463_c1_g1_i1.p2  | EOG093703N5 |
| TRINITY_DN13509_c0_g1_i2.p1  | EOG093703W1 |
| TRINITY_DN16036_c6_g1_i2.p1  | EOG093703WD |
| TRINITY_DN17887_c2_g1_i1.p1  | EOG093703YA |
| TRINITY_DN8168_c0_g1_i1.p1   | EOG0937049Y |
| TRINITY_DN322_c0_g1_i1.p1    | EOG093704GD |
| TRINITY_DN8457_c0_g1_i1.p1   | EOG093704HC |
| TRINITY_DN7271_c0_g1_i1.p1   | EOG093704Q0 |
| TRINITY_DN12715_c0_g1_i1.p1  | EOG0937050C |
| TRINITY_DN15258_c0_g1_i1.p1  | EOG093705DM |
| TRINITY_DN12674_c0_g1_i1.p1  | EOG093705EY |
| TRINITY_DN11881_c0_g5_i1.p1  | EOG093705KN |
| TRINITY_DN17171_c0_g1_i3.p1  | EOG093705YA |
| TRINITY_DN13870_c0_g1_i1.p1  | EOG093705YE |
| TRINITY_DN10209_c0_g1_i1.p1  | EOG093705Z6 |
| TRINITY_DN12996_c0_g1_i1.p1  | EOG0937060I |
| TRINITY_DN17071_c0_g1_i1.p1  | EOG0937060I |
| TRINITY_DN12442_c0_g1_i2.p1  | EOG0937066G |
| TRINITY_DN9554_c0_g1_i1.p1   | EOG0937068H |
| TRINITY_DN15030_c0_g1_i2.p1  | EOG093706PM |
| TRINITY_DN15030_c0_g1_i3.p1  | EOG093706PM |
| TRINITY_DN12024_c0_g1_i1.p1  | EOG09370762 |
| TRINITY_DN9948_c0_g1_i1.p1   | EOG093707B7 |
| TRINITY_DN14356_c0_g2_i3.p1  | EOG093707HK |
| TRINITY_DN7688_c0_g1_i1.p1   | EOG093707LO |
| TRINITY_DN14623_c0_g1_i6.p1  | EOG093707RF |
| TRINITY_DN7528_c0_g1_i1.p1   | EOG093707VN |
| TRINITY_DN13922_c0_g1_i1.p1  | EOG093707VQ |
| TRINITY_DN15368_c0_g2_i1.p1  | EOG093707VQ |
| TRINITY_DN15368_c1_g1_i1.p1  | EOG093707VQ |
| TRINITY_DN15793_c0_g1_i1.p1  | EOG093707VQ |
| TRINITY_DN17706_c3_g2_i4.p1  | EOG093707VQ |
| TRINITY_DN17706_c3_g2_i11.p1 | EOG093707VQ |
| TRINITY_DN9747_c0_g1_i1.p1   | EOG0937085E |
| TRINITY_DN16903_c0_g1_i1.p1  | EOG093708IM |
| TRINITY_DN10206_c0_g1_i1.p1  | EOG093708OP |
| TRINITY_DN13497_c0_g1_i2.p1  | EOG0937091Y |
| TRINITY_DN11165_c0_g1_i1.p1  | EOG0937092T |
| TRINITY_DN9737_c0_g1_i1.p1   | EOG0937092W |
| TRINITY_DN11657_c0_g1_i1.p1  | EOG093709BZ |
| TRINITY_DN10795_c0_g1_i1.p1  | EOG093709HP |
| TRINITY_DN8451_c0_g1_i1.p1   | EOG093709JG |
| TRINITY_DN12210_c0_g1_i2.p1  | EOG09370A0D |
| TRINITY_DN6639_c0_g1_i1.p1   | EOG09370A18 |
| TRINITY_DN7987_c0_g1_i1.p1   | EOG09370AL3 |
| TRINITY_DN17288_c0_g1_i3.p1  | EOG09370AS9 |
| TRINITY_DN5216_c0_g1_i1.p1   | EOG09370AV1 |
| TRINITY_DN10764_c0_g1_i1.p1  | EOG09370BBR |
| TRINITY_DN10433_c0_g1_i1.p1  | EOG09370BK5 |
| TRINITY_DN12363_c0_g1_i1.p1  | EOG09370BQ0 |
| TRINITY_DN13096_c0_g1_i5.p1  | EOG09370BYX |
| TRINITY_DN6608_c0_g1_i1.p1   | EOG09370CAN |
| TRINITY_DN15484_c0_g1_i1.p1  | EOG09370CAV |
| TRINITY_DN16944_c0_g1_i1.p1  | EOG09370CF1 |
| TRINITY_DN6007_c0_g1_i1.p1   | EOG09370CRF |
| TRINITY_DN7360_c0_g1_i1.p1   | EOG09370CTU |
| TRINITY_DN7258_c0_g1_i1.p1   | EOG09370CZ0 |
| TRINITY_DN12056_c0_g1_i1.p1  | EOG09370CZT |
| TRINITY_DN14207_c0_g2_i1.p1  | EOG09370D13 |
| TRINITY_DN13442_c0_g1_i2.p2  | EOG09370D05 |
| TRINITY_DN10968_c0_g1_i1.p1  | EOG09370DTG |

TRINITY\_DN8587\_c0\_g1\_i1.p1  
TRINITY\_DN4975\_c0\_g1\_i1.p1  
TRINITY\_DN10987\_c0\_g2\_i1.p1  
TRINITY\_DN12917\_c0\_g1\_i2.p1  
TRINITY\_DN17406\_c0\_g2\_i1.p1  
TRINITY\_DN8159\_c0\_g1\_i1.p1  
TRINITY\_DN11006\_c0\_g1\_i1.p1  
TRINITY\_DN7212\_c0\_g1\_i1.p1  
TRINITY\_DN16170\_c0\_g1\_i6.p1  
TRINITY\_DN14406\_c0\_g2\_i1.p1  
TRINITY\_DN10998\_c0\_g1\_i1.p1  
TRINITY\_DN6543\_c0\_g1\_i1.p1  
TRINITY\_DN13337\_c0\_g1\_i1.p1  
TRINITY\_DN9367\_c0\_g1\_i1.p1  
TRINITY\_DN11675\_c0\_g1\_i3.p1  
TRINITY\_DN13699\_c0\_g1\_i1.p2  
TRINITY\_DN11671\_c0\_g1\_i1.p1  
TRINITY\_DN7442\_c0\_g1\_i1.p1  
TRINITY\_DN8137\_c0\_g1\_i1.p1  
TRINITY\_DN9150\_c0\_g1\_i1.p1  
TRINITY\_DN10894\_c0\_g1\_i1.p1  
TRINITY\_DN10894\_c0\_g2\_i1.p1  
TRINITY\_DN16497\_c0\_g1\_i1.p1  
TRINITY\_DN16497\_c0\_g1\_i5.p1  
TRINITY\_DN8903\_c0\_g1\_i1.p1  
TRINITY\_DN10689\_c0\_g1\_i2.p1  
TRINITY\_DN15637\_c5\_g1\_i1.p1  
TRINITY\_DN7534\_c0\_g1\_i1.p1  
TRINITY\_DN12257\_c0\_g1\_i1.p1  
TRINITY\_DN8123\_c0\_g1\_i1.p1  
TRINITY\_DN10658\_c0\_g1\_i1.p1  
TRINITY\_DN10784\_c0\_g2\_i1.p1  
TRINITY\_DN15930\_c0\_g1\_i1.p1  
TRINITY\_DN17027\_c1\_g1\_i1.p1  
TRINITY\_DN9377\_c0\_g1\_i1.p1  
TRINITY\_DN17300\_c0\_g1\_i3.p1  
TRINITY\_DN11474\_c0\_g1\_i1.p1  
TRINITY\_DN13365\_c0\_g2\_i1.p1  
TRINITY\_DN4757\_c0\_g1\_i1.p1  
TRINITY\_DN10491\_c0\_g1\_i1.p1  
TRINITY\_DN16481\_c0\_g3\_i1.p1  
TRINITY\_DN16736\_c0\_g1\_i7.p1  
TRINITY\_DN16463\_c0\_g2\_i10.p1  
TRINITY\_DN11337\_c0\_g1\_i1.p1  
TRINITY\_DN5122\_c0\_g1\_i1.p1  
TRINITY\_DN10186\_c0\_g1\_i1.p1  
TRINITY\_DN5661\_c0\_g1\_i1.p1  
TRINITY\_DN5986\_c0\_g1\_i1.p1  
TRINITY\_DN6185\_c0\_g1\_i1.p1  
TRINITY\_DN7016\_c0\_g1\_i1.p1  
TRINITY\_DN15935\_c0\_g1\_i1.p1  
TRINITY\_DN9012\_c0\_g1\_i1.p1  
TRINITY\_DN4859\_c0\_g1\_i1.p1  
TRINITY\_DN8343\_c0\_g1\_i1.p1  
TRINITY\_DN14990\_c0\_g1\_i1.p1  
TRINITY\_DN4593\_c0\_g1\_i1.p1  
TRINITY\_DN11262\_c0\_g1\_i1.p1  
TRINITY\_DN16855\_c0\_g1\_i4.p1  
TRINITY\_DN10082\_c0\_g1\_i1.p1  
TRINITY\_DN12628\_c0\_g1\_i1.p1  
TRINITY\_DN8421\_c0\_g1\_i1.p1  
TRINITY\_DN6816\_c0\_g1\_i1.p1  
TRINITY\_DN6070\_c0\_g1\_i1.p1  
TRINITY\_DN12073\_c0\_g2\_i1.p1  
TRINITY\_DN8599\_c0\_g1\_i1.p1  
TRINITY\_DN9904\_c0\_g1\_i1.p1  
TRINITY\_DN9675\_c0\_g2\_i2.p1  
TRINITY\_DN7558\_c0\_g1\_i1.p1  
TRINITY\_DN11820\_c0\_g1\_i1.p1  
TRINITY\_DN7985\_c0\_g1\_i1.p1  
TRINITY\_DN1979\_c0\_g1\_i1.p1  
TRINITY\_DN6300\_c0\_g1\_i1.p1  
TRINITY\_DN15668\_c0\_g1\_i20.p1  
TRINITY\_DN9190\_c0\_g1\_i1.p1  
TRINITY\_DN19638\_c0\_g1\_i1.p1  
TRINITY\_DN7998\_c0\_g1\_i1.p1  
TRINITY\_DN14269\_c0\_g1\_i9.p1  
TRINITY\_DN11209\_c0\_g1\_i1.p1  
TRINITY\_DN7331\_c0\_g1\_i1.p1  
TRINITY\_DN12783\_c0\_g1\_i1.p1  
TRINITY\_DN7229\_c0\_g1\_i1.p1  
TRINITY\_DN11176\_c0\_g1\_i1.p1  
TRINITY\_DN14323\_c0\_g2\_i1.p1

EOG09370DV4  
EOG09370DXT  
EOG09370E0Y  
EOG09370E4U  
EOG09370E4W  
EOG09370E8S  
EOG09370EL3  
EOG09370ER5  
EOG09370F1Q  
EOG09370F3T  
EOG09370F47  
EOG09370FLD  
EOG09370FN1  
EOG09370FVX  
EOG09370FWQ  
EOG09370GEO  
EOG09370GHM  
EOG09370GIK  
EOG09370GJ7  
EOG09370GK0  
EOG09370GK0  
EOG09370GK0  
EOG09370H3E  
EOG09370H3E  
EOG09370H68  
EOG09370HBN  
EOG09370HD7  
EOG09370HKV  
EOG09370I3J  
EOG09370I7R  
EOG09370IH5  
EOG09370IH5  
EOG09370IMU  
EOG09370INZ  
EOG09370IUA  
EOG09370J9L  
EOG09370JJK  
EOG09370KD4  
EOG09370KJ3  
EOG09370KOV  
EOG09370KYZ  
EOG09370LFI  
EOG09370LMP  
EOG09370LQ2  
EOG09370LYY  
EOG09370MAO  
EOG09370MDU  
EOG09370MDU  
EOG09370MDU  
EOG09370MGF  
EOG09370MHI  
EOG09370MZ4  
EOG09370NBT  
EOG09370NIG  
EOG09370OLY  
EOG09370PBD  
EOG09370PLC  
EOG09370PLC  
EOG09370PN3  
EOG09370PYJ  
EOG09370QBK  
EOG09370QKS  
EOG09370QT3  
EOG09370R3M  
EOG09370R67  
EOG09370RCD  
EOG09370RCS  
EOG09370S0F  
EOG09370S1Z  
EOG09370S4T  
EOG09370SC9  
EOG09370SO4  
EOG09370SON  
EOG09370SV2  
EOG09370SV2  
EOG09370SYK  
EOG09370T6W  
EOG09370T9R  
EOG09370TBG  
EOG09370TBG  
EOG09370TBG  
EOG09370TFO

|                             |             |
|-----------------------------|-------------|
| TRINITY_DN7779_c0_g1_i1.p1  | EOG09370TG2 |
| TRINITY_DN2950_c0_g1_i1.p1  | EOG09370TG2 |
| TRINITY_DN14496_c1_g2_i1.p1 | EOG09370TG6 |
| TRINITY_DN10959_c0_g1_i1.p1 | EOG09370TH4 |
| TRINITY_DN17825_c2_g5_i1.p1 | EOG09370TS7 |
| TRINITY_DN14483_c0_g1_i1.p1 | EOG09370TTI |
| TRINITY_DN3658_c0_g1_i1.p1  | EOG09370U71 |
| TRINITY_DN15398_c0_g2_i3.p1 | EOG09370UID |
| TRINITY_DN7083_c0_g1_i1.p1  | EOG09370UID |
| TRINITY_DN7072_c0_g1_i1.p1  | EOG09370UID |
| TRINITY_DN4193_c0_g1_i1.p1  | EOG09370UR1 |
| TRINITY_DN5991_c0_g1_i1.p1  | EOG09370UR3 |
| TRINITY_DN13985_c0_g1_i2.p1 | EOG09370V9R |
| TRINITY_DN13985_c0_g1_i3.p1 | EOG09370V9R |
| TRINITY_DN17129_c2_g1_i3.p1 | EOG09370W86 |
| TRINITY_DN17129_c2_g1_i4.p1 | EOG09370W86 |
| TRINITY_DN17129_c2_g1_i5.p1 | EOG09370W86 |
| TRINITY_DN10555_c0_g1_i1.p1 | EOG09370WWI |
| TRINITY_DN12180_c0_g2_i2.p1 | EOG09370WYG |
| TRINITY_DN7105_c0_g1_i1.p1  | EOG09370WZX |
| TRINITY_DN5449_c0_g1_i1.p1  | EOG09370XO6 |
| TRINITY_DN7494_c0_g1_i1.p1  | EOG09370Y63 |
| TRINITY_DN2578_c0_g1_i1.p1  | EOG09370YCN |
| TRINITY_DN10306_c0_g1_i1.p1 | EOG09370ZOK |
| TRINITY_DN7112_c0_g1_i1.p1  | EOG0937106Y |
| TRINITY_DN7112_c0_g1_i2.p1  | EOG0937106Y |
| TRINITY_DN4896_c0_g1_i1.p1  | EOG09371088 |
| TRINITY_DN14912_c2_g1_i1.p1 | EOG093710SY |
| TRINITY_DN7598_c0_g1_i1.p1  | EOG093710T1 |
| TRINITY_DN19846_c0_g1_i1.p1 | EOG093711LC |
| TRINITY_DN6912_c0_g1_i1.p1  | EOG093711ZO |
| TRINITY_DN5876_c0_g1_i1.p1  | EOG0937128O |
| TRINITY_DN8370_c0_g1_i1.p1  | EOG0937129K |
| TRINITY_DN22347_c0_g1_i1.p1 | EOG093712Q6 |
| TRINITY_DN10954_c0_g1_i1.p1 | EOG09371330 |
| TRINITY_DN10954_c0_g1_i2.p1 | EOG09371330 |
| TRINITY_DN10954_c0_g2_i1.p1 | EOG09371330 |
| TRINITY_DN8658_c0_g1_i1.p1  | EOG0937133J |
| TRINITY_DN4490_c0_g1_i1.p1  | EOG09371431 |
| TRINITY_DN14000_c0_g4_i1.p1 | EOG093714Q2 |
| TRINITY_DN7269_c0_g1_i2.p1  | EOG093715EC |
| TRINITY_DN6937_c0_g1_i1.p1  | EOG0937167R |
| TRINITY_DN8524_c0_g1_i1.p1  | EOG0937186Q |
| TRINITY_DN7710_c0_g2_i1.p1  | EOG0937192A |
| TRINITY_DN8367_c0_g2_i1.p1  | EOG093719IK |
| TRINITY_DN10453_c0_g1_i1.p1 | EOG093719M8 |
| TRINITY_DN7034_c0_g1_i1.p1  | EOG09371BIR |

**b** *Holomastigotoides hartmanni*

| Protein ID                  | EOG         |
|-----------------------------|-------------|
| TRINITY_DN87115_c0_g1_i1.p1 | EOG093700N7 |
| TRINITY_DN95945_c0_g1_i3.p2 | EOG0937018Z |
| TRINITY_DN94662_c0_g1_i2.p1 | EOG093701IQ |
| TRINITY_DN94662_c0_g1_i7.p1 | EOG093701IQ |
| TRINITY_DN95834_c0_g1_i1.p1 | EOG093701S0 |
| TRINITY_DN91242_c0_g2_i1.p1 | EOG093702PE |
| TRINITY_DN93373_c1_g1_i2.p1 | EOG0937033T |
| TRINITY_DN90060_c0_g1_i1.p1 | EOG093703N5 |
| TRINITY_DN83727_c0_g1_i1.p1 | EOG093703W1 |
| TRINITY_DN94700_c1_g6_i1.p1 | EOG093703WD |
| TRINITY_DN80039_c0_g1_i1.p1 | EOG093704HC |
| TRINITY_DN90636_c0_g1_i2.p1 | EOG0937050C |
| TRINITY_DN80852_c0_g1_i1.p1 | EOG093705DM |
| TRINITY_DN80995_c0_g1_i1.p1 | EOG093705DM |
| TRINITY_DN83810_c0_g1_i1.p1 | EOG093705KN |
| TRINITY_DN89969_c0_g1_i2.p2 | EOG093705U4 |
| TRINITY_DN79868_c0_g1_i1.p1 | EOG093705Z6 |
| TRINITY_DN86024_c0_g1_i2.p1 | EOG0937060I |
| TRINITY_DN89023_c0_g1_i1.p1 | EOG0937066G |
| TRINITY_DN94240_c0_g1_i2.p1 | EOG093707B7 |
| TRINITY_DN78434_c0_g1_i1.p1 | EOG093707HK |
| TRINITY_DN93115_c0_g1_i1.p1 | EOG093707RF |
| TRINITY_DN85317_c0_g1_i2.p1 | EOG093707VN |
| TRINITY_DN86597_c0_g1_i1.p1 | EOG0937084T |
| TRINITY_DN80570_c0_g1_i1.p1 | EOG0937085E |
| TRINITY_DN86499_c0_g1_i1.p1 | EOG093708IM |
| TRINITY_DN93353_c0_g1_i1.p2 | EOG093708OP |
| TRINITY_DN92001_c0_g1_i2.p2 | EOG0937092T |
| TRINITY_DN94501_c0_g1_i1.p1 | EOG093709HP |
| TRINITY_DN90777_c2_g1_i5.p1 | EOG09370ADO |
| TRINITY_DN70331_c0_g1_i1.p2 | EOG09370AS9 |
| TRINITY_DN83267_c0_g1_i1.p1 | EOG09370AV1 |
| TRINITY_DN90959_c0_g1_i2.p2 | EOG09370BQO |

TRINITY\_DN91188\_c0\_g1\_i1.p1  
TRINITY\_DN90090\_c0\_g1\_i1.p1  
TRINITY\_DN82841\_c0\_g1\_i1.p1  
TRINITY\_DN91110\_c0\_g2\_i1.p1  
TRINITY\_DN86543\_c0\_g1\_i2.p1  
TRINITY\_DN88707\_c0\_g1\_i1.p1  
TRINITY\_DN88707\_c0\_g1\_i2.p1  
TRINITY\_DN87363\_c0\_g1\_i2.p1  
TRINITY\_DN94094\_c0\_g1\_i3.p2  
TRINITY\_DN89954\_c0\_g1\_i1.p1  
TRINITY\_DN84723\_c0\_g1\_i1.p1  
TRINITY\_DN76155\_c0\_g1\_i1.p3  
TRINITY\_DN90861\_c0\_g1\_i1.p1  
TRINITY\_DN85098\_c0\_g1\_i1.p1  
TRINITY\_DN94690\_c0\_g1\_i4.p1  
TRINITY\_DN91225\_c0\_g1\_i2.p2  
TRINITY\_DN79644\_c0\_g1\_i1.p1  
TRINITY\_DN82898\_c0\_g1\_i1.p1  
TRINITY\_DN80789\_c0\_g1\_i1.p1  
TRINITY\_DN87220\_c0\_g1\_i1.p1  
TRINITY\_DN77801\_c0\_g1\_i1.p1  
TRINITY\_DN86116\_c0\_g1\_i1.p1  
TRINITY\_DN94782\_c0\_g1\_i2.p2  
TRINITY\_DN94782\_c0\_g1\_i3.p2  
TRINITY\_DN83223\_c0\_g1\_i3.p1  
TRINITY\_DN94776\_c0\_g1\_i1.p1  
TRINITY\_DN86941\_c0\_g1\_i1.p2  
TRINITY\_DN91768\_c0\_g7\_i2.p1  
TRINITY\_DN82305\_c0\_g1\_i1.p1  
TRINITY\_DN92840\_c1\_g1\_i1.p1  
TRINITY\_DN92840\_c1\_g1\_i2.p1  
TRINITY\_DN93530\_c5\_g1\_i2.p1  
TRINITY\_DN93598\_c0\_g1\_i2.p1  
TRINITY\_DN87150\_c0\_g1\_i1.p1  
TRINITY\_DN90700\_c7\_g1\_i1.p3  
TRINITY\_DN94864\_c2\_g1\_i1.p1  
TRINITY\_DN94864\_c2\_g1\_i2.p1  
TRINITY\_DN95996\_c0\_g8\_i1.p1  
TRINITY\_DN81846\_c0\_g1\_i1.p1  
TRINITY\_DN95283\_c0\_g1\_i2.p1  
TRINITY\_DN70400\_c0\_g1\_i1.p1  
TRINITY\_DN86599\_c0\_g2\_i1.p1  
TRINITY\_DN90250\_c0\_g1\_i1.p1  
TRINITY\_DN106038\_c0\_g1\_i1.p1  
TRINITY\_DN90612\_c2\_g3\_i1.p3  
TRINITY\_DN88446\_c0\_g1\_i2.p2  
TRINITY\_DN93472\_c0\_g2\_i1.p1  
TRINITY\_DN93245\_c0\_g1\_i1.p1  
TRINITY\_DN94657\_c6\_g2\_i1.p1  
TRINITY\_DN91157\_c0\_g1\_i1.p1  
TRINITY\_DN79406\_c0\_g1\_i1.p1  
TRINITY\_DN93289\_c0\_g1\_i1.p2  
TRINITY\_DN93032\_c0\_g2\_i1.p1  
TRINITY\_DN88937\_c0\_g1\_i1.p2  
TRINITY\_DN82398\_c0\_g1\_i1.p1  
TRINITY\_DN82166\_c0\_g1\_i1.p1  
TRINITY\_DN84982\_c0\_g2\_i1.p2  
TRINITY\_DN91816\_c0\_g1\_i1.p1  
TRINITY\_DN82262\_c0\_g1\_i1.p1  
TRINITY\_DN92386\_c0\_g1\_i1.p1  
TRINITY\_DN82937\_c0\_g1\_i1.p1  
TRINITY\_DN84047\_c0\_g1\_i1.p2  
TRINITY\_DN93537\_c0\_g2\_i1.p1  
TRINITY\_DN87284\_c0\_g1\_i1.p1  
TRINITY\_DN95816\_c0\_g1\_i3.p1  
TRINITY\_DN95816\_c0\_g1\_i4.p2  
TRINITY\_DN95816\_c0\_g1\_i5.p2  
TRINITY\_DN95816\_c0\_g1\_i7.p1  
TRINITY\_DN91596\_c0\_g1\_i1.p1  
TRINITY\_DN77957\_c0\_g1\_i1.p1  
TRINITY\_DN84375\_c0\_g1\_i1.p1  
TRINITY\_DN89356\_c0\_g1\_i1.p2  
TRINITY\_DN90147\_c0\_g1\_i1.p1  
TRINITY\_DN94471\_c0\_g1\_i1.p1  
TRINITY\_DN94471\_c0\_g1\_i2.p2  
TRINITY\_DN84265\_c0\_g1\_i1.p1  
TRINITY\_DN82209\_c0\_g1\_i1.p1  
TRINITY\_DN90801\_c6\_g4\_i1.p1  
TRINITY\_DN82821\_c0\_g1\_i1.p1  
TRINITY\_DN79740\_c0\_g1\_i1.p1  
TRINITY\_DN79790\_c0\_g1\_i1.p1  
TRINITY\_DN79352\_c0\_g1\_i1.p1  
TRINITY\_DN77520\_c0\_g1\_i1.p1

EOG09370CAN  
EOG09370CAV  
EOG09370CTU  
EOG09370CZ0  
EOG09370CZT  
EOG09370CZT  
EOG09370CZT  
EOG09370D13  
EOG09370DO5  
EOG09370DS4  
EOG09370DTG  
EOG09370DXT  
EOG09370E0Y  
EOG09370E4U  
EOG09370E4W  
EOG09370E8S  
EOG09370ER5  
EOG09370F3T  
EOG09370FLD  
EOG09370FN1  
EOG09370FVX  
EOG09370FWQ  
EOG09370GIK  
EOG09370GIK  
EOG09370GIK  
EOG09370GJ7  
EOG09370GK0  
EOG09370H3E  
EOG09370HD7  
EOG09370HKV  
EOG09370HKV  
EOG09370I3J  
EOG09370IH5  
EOG09370IH5  
EOG09370J9L  
EOG09370JIK  
EOG09370JIK  
EOG09370JIK  
EOG09370KJ3  
EOG09370KYZ  
EOG09370LFI  
EOG09370LMP  
EOG09370MAO  
EOG09370MDU  
EOG09370MGF  
EOG09370MZ4  
EOG09370NIG  
EOG09370OLY  
EOG09370PBD  
EOG09370PLC  
EOG09370PYJ  
EOG09370QT3  
EOG09370RCD  
EOG09370RCS  
EOG09370S1Z  
EOG09370S4T  
EOG09370SON  
EOG09370SV2  
EOG09370SV2  
EOG09370T6W  
EOG09370T9R  
EOG09370TBD  
EOG09370TBG  
EOG09370TBG  
EOG09370TCX  
EOG09370TCX  
EOG09370TCX  
EOG09370TCX  
EOG09370TFO  
EOG09370TG6  
EOG09370TS7  
EOG09370UID  
EOG09370UID  
EOG09370UR3  
EOG09370UR3  
EOG09370V9R  
EOG09370W6N  
EOG09370W86  
EOG09370WYG  
EOG09370X1T  
EOG09370YCN  
EOG09371088  
EOG093710A7

|                             |             |
|-----------------------------|-------------|
| TRINITY_DN82855_c0_g1_i1.p1 | EOG093710SY |
| TRINITY_DN96026_c0_g2_i3.p1 | EOG093710T1 |
| TRINITY_DN35650_c0_g1_i1.p1 | EOG093710T1 |
| TRINITY_DN94235_c0_g1_i1.p1 | EOG0937112Y |
| TRINITY_DN83116_c0_g1_i1.p2 | EOG093711LC |
| TRINITY_DN77018_c0_g1_i1.p1 | EOG093711QY |
| TRINITY_DN64353_c0_g1_i1.p1 | EOG093711ZO |
| TRINITY_DN90925_c0_g1_i3.p1 | EOG0937128O |
| TRINITY_DN93015_c0_g1_i1.p2 | EOG0937129K |
| TRINITY_DN83041_c0_g1_i1.p5 | EOG093712Q6 |
| TRINITY_DN85345_c0_g1_i1.p1 | EOG0937133J |
| TRINITY_DN88620_c1_g1_i3.p1 | EOG0937133J |
| TRINITY_DN66100_c0_g1_i1.p1 | EOG09371431 |
| TRINITY_DN81579_c0_g1_i1.p2 | EOG09371431 |
| TRINITY_DN83023_c0_g1_i1.p3 | EOG093714JU |
| TRINITY_DN83023_c0_g1_i2.p2 | EOG093714JU |
| TRINITY_DN88496_c1_g1_i1.p1 | EOG093716T7 |
| TRINITY_DN88669_c0_g2_i1.p1 | EOG0937186Q |
| TRINITY_DN14067_c0_g1_i1.p1 | EOG0937192A |
| TRINITY_DN73118_c0_g1_i1.p2 | EOG093719M8 |
| TRINITY_DN84806_c0_g1_i2.p2 | EOG09371BIR |
| TRINITY_DN84823_c0_g1_i1.p1 | EOG093701EE |
| TRINITY_DN79629_c0_g1_i1.p2 | EOG093701SQ |
| TRINITY_DN94881_c0_g2_i1.p1 | EOG093704Q0 |
| TRINITY_DN88493_c0_g1_i1.p1 | EOG093705EY |
| TRINITY_DN85566_c0_g1_i1.p1 | EOG093707VQ |
| TRINITY_DN85745_c0_g1_i1.p1 | EOG093709BZ |
| TRINITY_DN91761_c0_g1_i1.p1 | EOG09370EHZ |

***c Holomastigotoides minor***

| Protein ID                  | EOG         |
|-----------------------------|-------------|
| TRINITY_DN60836_c0_g1_i1.p1 | EOG093700N7 |
| TRINITY_DN68991_c0_g1_i1.p1 | EOG093701S0 |
| TRINITY_DN57149_c0_g2_i2.p1 | EOG093701S0 |
| TRINITY_DN60463_c0_g1_i1.p1 | EOG093701SQ |
| TRINITY_DN67328_c0_g1_i2.p1 | EOG093702AT |
| TRINITY_DN68662_c1_g3_i1.p1 | EOG093702PE |
| TRINITY_DN63273_c0_g1_i2.p1 | EOG0937033T |
| TRINITY_DN63273_c0_g1_i3.p1 | EOG0937033T |
| TRINITY_DN56552_c0_g1_i1.p1 | EOG093703N5 |
| TRINITY_DN57357_c0_g1_i1.p1 | EOG093703W1 |
| TRINITY_DN67989_c0_g1_i1.p1 | EOG093703WD |
| TRINITY_DN69172_c1_g1_i1.p1 | EOG0937049Y |
| TRINITY_DN60458_c0_g1_i1.p2 | EOG093705DM |
| TRINITY_DN3027_c0_g1_i1.p1  | EOG093705EY |
| TRINITY_DN63239_c0_g1_i1.p2 | EOG093705U4 |
| TRINITY_DN85530_c0_g1_i1.p1 | EOG093705Z6 |
| TRINITY_DN63887_c1_g1_i1.p1 | EOG09370762 |
| TRINITY_DN59542_c0_g1_i1.p1 | EOG093707B7 |
| TRINITY_DN63696_c0_g1_i2.p1 | EOG093707LO |
| TRINITY_DN62389_c0_g1_i1.p1 | EOG093707RF |
| TRINITY_DN57940_c0_g1_i1.p1 | EOG093707VN |
| TRINITY_DN65412_c0_g1_i1.p1 | EOG093707VQ |
| TRINITY_DN65412_c0_g1_i2.p1 | EOG093707VQ |
| TRINITY_DN59292_c0_g1_i1.p1 | EOG0937084T |
| TRINITY_DN64740_c0_g2_i1.p1 | EOG0937085E |
| TRINITY_DN57730_c0_g1_i1.p1 | EOG093708IM |
| TRINITY_DN59991_c0_g1_i1.p1 | EOG0937091Y |
| TRINITY_DN60128_c0_g1_i1.p1 | EOG0937092W |
| TRINITY_DN61190_c0_g1_i1.p1 | EOG093709HP |
| TRINITY_DN66569_c0_g1_i3.p1 | EOG09370A18 |
| TRINITY_DN67819_c0_g1_i3.p2 | EOG09370AV1 |
| TRINITY_DN64190_c0_g1_i1.p1 | EOG09370BBR |
| TRINITY_DN59968_c0_g1_i1.p1 | EOG09370BQO |
| TRINITY_DN65397_c0_g1_i5.p1 | EOG09370CAN |
| TRINITY_DN57386_c0_g1_i1.p2 | EOG09370CTU |
| TRINITY_DN54520_c0_g1_i1.p1 | EOG09370CZ0 |
| TRINITY_DN56035_c0_g1_i1.p1 | EOG09370CZ0 |
| TRINITY_DN65704_c0_g1_i1.p1 | EOG09370CZT |
| TRINITY_DN46037_c0_g1_i1.p1 | EOG09370D13 |
| TRINITY_DN66813_c0_g2_i2.p4 | EOG09370DO5 |
| TRINITY_DN47133_c0_g1_i1.p1 | EOG09370DTG |
| TRINITY_DN69746_c0_g1_i5.p1 | EOG09370DV4 |
| TRINITY_DN67223_c0_g1_i3.p1 | EOG09370E0Y |
| TRINITY_DN67223_c0_g1_i5.p1 | EOG09370E0Y |
| TRINITY_DN61573_c0_g1_i1.p1 | EOG09370E4U |
| TRINITY_DN69178_c0_g1_i2.p3 | EOG09370E4W |
| TRINITY_DN67562_c0_g1_i1.p1 | EOG09370E8S |
| TRINITY_DN67965_c0_g1_i1.p1 | EOG09370ER5 |
| TRINITY_DN67965_c0_g1_i2.p1 | EOG09370ER5 |
| TRINITY_DN57000_c0_g1_i1.p1 | EOG09370F3T |
| TRINITY_DN67433_c0_g2_i1.p1 | EOG09370FLD |
| TRINITY_DN64540_c0_g1_i1.p1 | EOG09370FN1 |

TRINITY\_DN15720\_c0\_g1\_i1.p1  
TRINITY\_DN58156\_c0\_g1\_i1.p1  
TRINITY\_DN62556\_c0\_g1\_i3.p2  
TRINITY\_DN62556\_c0\_g1\_i4.p1  
TRINITY\_DN68023\_c0\_g1\_i1.p1  
TRINITY\_DN64427\_c0\_g1\_i1.p1  
TRINITY\_DN64812\_c0\_g2\_i1.p1  
TRINITY\_DN40541\_c0\_g1\_i1.p1  
TRINITY\_DN63930\_c5\_g3\_i1.p1  
TRINITY\_DN66541\_c2\_g3\_i1.p1  
TRINITY\_DN62796\_c0\_g1\_i1.p2  
TRINITY\_DN52769\_c0\_g1\_i1.p1  
TRINITY\_DN57844\_c0\_g1\_i1.p1  
TRINITY\_DN65333\_c0\_g1\_i2.p1  
TRINITY\_DN65333\_c0\_g1\_i4.p1  
TRINITY\_DN41744\_c0\_g1\_i1.p2  
TRINITY\_DN63130\_c0\_g1\_i2.p1  
TRINITY\_DN67940\_c2\_g4\_i1.p1  
TRINITY\_DN64456\_c0\_g1\_i1.p1  
TRINITY\_DN56488\_c0\_g1\_i1.p1  
TRINITY\_DN63268\_c0\_g2\_i1.p1  
TRINITY\_DN48341\_c0\_g1\_i1.p2  
TRINITY\_DN61429\_c0\_g1\_i1.p1  
TRINITY\_DN61429\_c0\_g1\_i3.p1  
TRINITY\_DN66650\_c0\_g1\_i1.p2  
TRINITY\_DN64905\_c0\_g2\_i1.p1  
TRINITY\_DN68783\_c0\_g2\_i1.p1  
TRINITY\_DN61870\_c0\_g1\_i1.p1  
TRINITY\_DN61870\_c0\_g1\_i3.p1  
TRINITY\_DN61202\_c0\_g1\_i1.p1  
TRINITY\_DN66917\_c0\_g1\_i1.p1  
TRINITY\_DN52807\_c0\_g1\_i1.p1  
TRINITY\_DN58091\_c0\_g1\_i1.p2  
TRINITY\_DN65213\_c0\_g1\_i2.p1  
TRINITY\_DN62765\_c0\_g1\_i1.p1  
TRINITY\_DN62765\_c0\_g1\_i2.p1  
TRINITY\_DN58534\_c0\_g1\_i1.p1  
TRINITY\_DN68904\_c3\_g3\_i1.p1  
TRINITY\_DN58283\_c0\_g2\_i1.p1  
TRINITY\_DN60591\_c0\_g1\_i1.p1  
TRINITY\_DN65845\_c0\_g1\_i1.p1  
TRINITY\_DN68140\_c0\_g1\_i1.p1  
TRINITY\_DN58529\_c0\_g1\_i1.p1  
TRINITY\_DN59379\_c0\_g1\_i1.p1  
TRINITY\_DN68764\_c0\_g1\_i1.p1  
TRINITY\_DN68764\_c0\_g1\_i2.p1  
TRINITY\_DN68764\_c0\_g1\_i3.p1  
TRINITY\_DN67455\_c0\_g1\_i3.p2  
TRINITY\_DN62600\_c0\_g1\_i1.p1  
TRINITY\_DN68391\_c0\_g1\_i3.p1  
TRINITY\_DN68391\_c0\_g1\_i4.p1  
TRINITY\_DN53357\_c0\_g1\_i1.p1  
TRINITY\_DN68225\_c1\_g1\_i1.p1  
TRINITY\_DN66824\_c0\_g1\_i1.p1  
TRINITY\_DN66824\_c0\_g1\_i2.p2  
TRINITY\_DN65337\_c0\_g1\_i2.p2  
TRINITY\_DN22945\_c0\_g1\_i1.p1  
TRINITY\_DN28392\_c0\_g1\_i1.p1  
TRINITY\_DN16895\_c0\_g1\_i1.p1  
TRINITY\_DN42419\_c0\_g1\_i1.p2  
TRINITY\_DN68513\_c0\_g1\_i1.p2  
TRINITY\_DN67978\_c1\_g2\_i1.p1  
TRINITY\_DN94479\_c0\_g1\_i1.p1  
TRINITY\_DN59032\_c0\_g1\_i1.p1  
TRINITY\_DN59576\_c0\_g1\_i1.p1  
TRINITY\_DN59576\_c0\_g1\_i2.p1  
TRINITY\_DN53111\_c0\_g1\_i1.p4  
TRINITY\_DN69160\_c0\_g4\_i1.p3  
TRINITY\_DN20107\_c0\_g1\_i1.p1  
TRINITY\_DN43586\_c0\_g1\_i1.p1  
TRINITY\_DN56325\_c0\_g1\_i1.p3  
TRINITY\_DN68714\_c0\_g1\_i3.p2  
TRINITY\_DN52924\_c0\_g1\_i1.p2  
TRINITY\_DN49120\_c0\_g1\_i1.p1  
TRINITY\_DN67630\_c2\_g1\_i1.p2  
TRINITY\_DN78932\_c0\_g1\_i1.p1  
TRINITY\_DN49891\_c0\_g1\_i1.p1  
TRINITY\_DN95295\_c0\_g1\_i1.p1  
TRINITY\_DN55348\_c0\_g1\_i1.p1  
TRINITY\_DN16970\_c0\_g1\_i1.p1  
TRINITY\_DN68002\_c0\_g4\_i1.p1  
TRINITY\_DN68002\_c0\_g4\_i2.p2  
TRINITY\_DN68002\_c0\_g4\_i5.p1

EOG09370FN1  
EOG09370FVX  
EOG09370GHM  
EOG09370GHM  
EOG09370GJ7  
EOG09370GK0  
EOG09370GK0  
EOG09370H3E  
EOG09370H68  
EOG09370HBN  
EOG09370HD7  
EOG09370HKV  
EOG09370I7R  
EOG09370IH5  
EOG09370IH5  
EOG09370IH5  
EOG09370J9L  
EOG09370JIK  
EOG09370LFI  
EOG09370LMP  
EOG09370MAO  
EOG09370MDU  
EOG09370MDU  
EOG09370MGF  
EOG09370MZ4  
EOG09370NBT  
EOG09370NIG  
EOG09370NIG  
EOG09370OOLY  
EOG09370PBD  
EOG09370PLC  
EOG09370PLC  
EOG09370PYJ  
EOG09370QBK  
EOG09370QBK  
EOG09370QKS  
EOG09370QT3  
EOG09370R3M  
EOG09370R67  
EOG09370RCS  
EOG09370SON  
EOG09370SV2  
EOG09370SV2  
EOG09370T6W  
EOG09370T6W  
EOG09370T6W  
EOG09370T9R  
EOG09370TBD  
EOG09370TBG  
EOG09370TBG  
EOG09370TFO  
EOG09370TG2  
EOG09370TG2  
EOG09370TS7  
EOG09370UID  
EOG09370UID  
EOG09370UID  
EOG09370UR1  
EOG09370UR3  
EOG09370V9R  
EOG09370W6N  
EOG09370W6N  
EOG09370W86  
EOG09370W86  
EOG09370WWI  
EOG09370X1T  
EOG09370X1T  
EOG09370Y63  
EOG09370YCN  
EOG09371088  
EOG093710A7  
EOG093710SY  
EOG093710T1  
EOG093710T1  
EOG0937112Y  
EOG093711LC  
EOG093711LC  
EOG093711ZO  
EOG0937128O  
EOG0937128O  
EOG0937128O

|                             |             |
|-----------------------------|-------------|
| TRINITY_DN66852_c2_g1_i1.p1 | EOG0937129K |
| TRINITY_DN67048_c7_g2_i1.p1 | EOG0937133J |
| TRINITY_DN51725_c0_g1_i1.p2 | EOG09371431 |
| TRINITY_DN62512_c0_g1_i1.p1 | EOG09371431 |
| TRINITY_DN62512_c0_g1_i3.p1 | EOG09371431 |
| TRINITY_DN90217_c0_g1_i1.p1 | EOG093719M8 |
| TRINITY_DN58932_c0_g1_i1.p1 | EOG093701EE |
| TRINITY_DN67552_c0_g1_i1.p1 | EOG093701IQ |
| TRINITY_DN57348_c0_g1_i1.p1 | EOG093704Q0 |
| TRINITY_DN66612_c1_g1_i1.p1 | EOG0937066G |
| TRINITY_DN64833_c1_g1_i2.p1 | EOG09370AJP |
| TRINITY_DN65658_c0_g3_i2.p4 | EOG09370CF1 |
| TRINITY_DN68114_c0_g1_i1.p1 | EOG09370EHZ |
| TRINITY_DN66755_c1_g1_i2.p1 | EOG09370I3J |

**d *Cononympha leidy***

| Protein ID                  | EOG         |
|-----------------------------|-------------|
| TRINITY_DN36042_c0_g2_i2.p1 | EOG093700N7 |
| TRINITY_DN31854_c0_g1_i1.p1 | EOG093701EE |
| TRINITY_DN32694_c0_g1_i1.p1 | EOG093701S0 |
| TRINITY_DN35590_c0_g1_i2.p1 | EOG093701SQ |
| TRINITY_DN22810_c0_g1_i1.p1 | EOG093702PE |
| TRINITY_DN32517_c0_g1_i1.p1 | EOG0937033T |
| TRINITY_DN25036_c0_g1_i1.p1 | EOG093703W1 |
| TRINITY_DN31263_c0_g1_i1.p1 | EOG093703WD |
| TRINITY_DN30548_c0_g1_i1.p1 | EOG093703YA |
| TRINITY_DN27244_c0_g1_i2.p1 | EOG093704HC |
| TRINITY_DN33118_c0_g1_i1.p1 | EOG093705DM |
| TRINITY_DN33118_c0_g1_i2.p1 | EOG093705DM |
| TRINITY_DN34432_c0_g2_i1.p1 | EOG093705EY |
| TRINITY_DN17410_c0_g1_i1.p1 | EOG093705KN |
| TRINITY_DN29942_c0_g1_i1.p1 | EOG093705Z6 |
| TRINITY_DN24253_c0_g1_i1.p1 | EOG0937060I |
| TRINITY_DN32437_c0_g1_i1.p1 | EOG0937066G |
| TRINITY_DN29115_c0_g1_i1.p1 | EOG09370762 |
| TRINITY_DN28203_c0_g1_i2.p1 | EOG093707B7 |
| TRINITY_DN33211_c0_g1_i3.p2 | EOG093707HK |
| TRINITY_DN24856_c0_g1_i1.p1 | EOG093707LO |
| TRINITY_DN26027_c0_g1_i1.p1 | EOG093707RF |
| TRINITY_DN31097_c0_g1_i2.p1 | EOG093707VN |
| TRINITY_DN33951_c0_g2_i2.p1 | EOG093707VQ |
| TRINITY_DN26702_c0_g1_i1.p1 | EOG093707VQ |
| TRINITY_DN31374_c0_g1_i1.p1 | EOG0937085E |
| TRINITY_DN21884_c0_g1_i1.p1 | EOG093708IM |
| TRINITY_DN30740_c3_g2_i1.p1 | EOG093708OP |
| TRINITY_DN30924_c0_g1_i1.p1 | EOG0937091Y |
| TRINITY_DN32815_c0_g1_i1.p1 | EOG0937092T |
| TRINITY_DN31878_c0_g1_i2.p1 | EOG0937092W |
| TRINITY_DN34758_c0_g3_i1.p1 | EOG093709HP |
| TRINITY_DN30165_c0_g1_i2.p1 | EOG09370ADO |
| TRINITY_DN32255_c0_g1_i1.p1 | EOG09370A18 |
| TRINITY_DN31632_c0_g1_i1.p1 | EOG09370AS9 |
| TRINITY_DN31632_c0_g1_i3.p1 | EOG09370AS9 |
| TRINITY_DN27291_c0_g1_i1.p1 | EOG09370BQO |
| TRINITY_DN33738_c0_g1_i1.p1 | EOG09370CAN |
| TRINITY_DN3571_c0_g1_i1.p1  | EOG09370CF1 |
| TRINITY_DN31569_c0_g1_i1.p1 | EOG09370CTU |
| TRINITY_DN29795_c0_g1_i1.p1 | EOG09370CZ0 |
| TRINITY_DN31300_c0_g1_i1.p1 | EOG09370CZT |
| TRINITY_DN31076_c0_g1_i1.p1 | EOG09370D13 |
| TRINITY_DN22806_c0_g1_i1.p1 | EOG09370DTG |
| TRINITY_DN19370_c0_g1_i1.p1 | EOG09370DXT |
| TRINITY_DN32799_c0_g1_i3.p1 | EOG09370E0Y |
| TRINITY_DN32968_c0_g1_i1.p1 | EOG09370E4U |
| TRINITY_DN23858_c0_g1_i1.p1 | EOG09370E4W |
| TRINITY_DN25175_c0_g1_i1.p1 | EOG09370E8S |
| TRINITY_DN27271_c0_g1_i1.p1 | EOG09370EL3 |
| TRINITY_DN32750_c0_g1_i1.p1 | EOG09370FLD |
| TRINITY_DN25753_c0_g1_i1.p1 | EOG09370FN1 |
| TRINITY_DN26106_c0_g1_i1.p1 | EOG09370FVX |
| TRINITY_DN35571_c0_g1_i1.p1 | EOG09370GHM |
| TRINITY_DN21445_c0_g1_i1.p1 | EOG09370GHM |
| TRINITY_DN27716_c0_g1_i1.p1 | EOG09370GIK |
| TRINITY_DN32037_c0_g1_i1.p1 | EOG09370GJ7 |
| TRINITY_DN28187_c0_g1_i1.p1 | EOG09370GK0 |
| TRINITY_DN28161_c0_g1_i1.p1 | EOG09370GK0 |
| TRINITY_DN28161_c0_g1_i2.p1 | EOG09370GK0 |
| TRINITY_DN32051_c0_g1_i1.p1 | EOG09370GK0 |
| TRINITY_DN32051_c0_g2_i1.p1 | EOG09370GK0 |
| TRINITY_DN20739_c0_g1_i1.p1 | EOG09370H3E |
| TRINITY_DN23971_c0_g1_i1.p1 | EOG09370HBN |
| TRINITY_DN34733_c0_g1_i1.p1 | EOG09370HD7 |
| TRINITY_DN33833_c0_g1_i1.p1 | EOG09370HKV |

TRINITY\_DN28928\_c0\_g1\_i1.p1 EOG09370I3J  
TRINITY\_DN22661\_c0\_g1\_i1.p1 EOG09370I7R  
TRINITY\_DN20294\_c0\_g1\_i1.p1 EOG09370IH5  
TRINITY\_DN33200\_c0\_g1\_i1.p1 EOG09370J9L  
TRINITY\_DN33200\_c0\_g1\_i3.p1 EOG09370J9L  
TRINITY\_DN25327\_c0\_g1\_i1.p1 EOG09370JZ3  
TRINITY\_DN27118\_c0\_g1\_i2.p1 EOG09370KJ3  
TRINITY\_DN31579\_c0\_g1\_i1.p1 EOG09370KYZ  
TRINITY\_DN25804\_c0\_g1\_i1.p1 EOG09370LFI  
TRINITY\_DN34037\_c0\_g1\_i2.p1 EOG09370LMP  
TRINITY\_DN34037\_c0\_g1\_i4.p1 EOG09370LMP  
TRINITY\_DN27028\_c0\_g1\_i1.p2 EOG09370LQ2  
TRINITY\_DN30681\_c0\_g1\_i2.p1 EOG09370MAO  
TRINITY\_DN34639\_c0\_g1\_i1.p1 EOG09370MDU  
TRINITY\_DN29018\_c0\_g1\_i1.p2 EOG09370MGF  
TRINITY\_DN27339\_c0\_g1\_i1.p1 EOG09370MHI  
TRINITY\_DN29111\_c0\_g1\_i1.p1 EOG09370NBT  
TRINITY\_DN20144\_c0\_g1\_i1.p1 EOG09370OLY  
TRINITY\_DN32158\_c0\_g1\_i2.p1 EOG09370PBD  
TRINITY\_DN25613\_c0\_g1\_i1.p1 EOG09370PLC  
TRINITY\_DN29984\_c0\_g1\_i2.p1 EOG09370PLC  
TRINITY\_DN28843\_c0\_g1\_i1.p1 EOG09370PYJ  
TRINITY\_DN18705\_c0\_g1\_i1.p1 EOG09370QBK  
TRINITY\_DN24622\_c0\_g1\_i1.p1 EOG09370QKS  
TRINITY\_DN24622\_c0\_g2\_i1.p1 EOG09370QKS  
TRINITY\_DN23031\_c0\_g1\_i1.p1 EOG09370QT3  
TRINITY\_DN34824\_c1\_g1\_i1.p1 EOG09370RCD  
TRINITY\_DN33112\_c0\_g1\_i1.p1 EOG09370S1Z  
TRINITY\_DN28341\_c0\_g1\_i1.p1 EOG09370S3E  
TRINITY\_DN1375\_c0\_g1\_i1.p1 EOG09370S4T  
TRINITY\_DN30062\_c0\_g1\_i1.p3 EOG09370SC9  
TRINITY\_DN27185\_c0\_g1\_i1.p1 EOG09370SV2  
TRINITY\_DN14082\_c0\_g1\_i1.p1 EOG09370SV2  
TRINITY\_DN26170\_c0\_g1\_i1.p1 EOG09370T6W  
TRINITY\_DN20389\_c0\_g1\_i1.p1 EOG09370T9R  
TRINITY\_DN22572\_c0\_g1\_i1.p1 EOG09370T9R  
TRINITY\_DN26791\_c0\_g1\_i3.p1 EOG09370TBD  
TRINITY\_DN26522\_c0\_g1\_i1.p1 EOG09370TBG  
TRINITY\_DN29486\_c0\_g1\_i1.p1 EOG09370TBG  
TRINITY\_DN29709\_c0\_g1\_i1.p1 EOG09370TBG  
TRINITY\_DN29709\_c0\_g1\_i2.p1 EOG09370TBG  
TRINITY\_DN22325\_c0\_g1\_i1.p1 EOG09370TCX  
TRINITY\_DN28393\_c0\_g1\_i1.p1 EOG09370TFO  
TRINITY\_DN35579\_c0\_g3\_i1.p1 EOG09370UID  
TRINITY\_DN35579\_c0\_g3\_i2.p1 EOG09370UID  
TRINITY\_DN39316\_c0\_g1\_i1.p1 EOG09370UID  
TRINITY\_DN31017\_c0\_g1\_i1.p1 EOG09370UR1  
TRINITY\_DN31455\_c0\_g1\_i2.p1 EOG09370V9R  
TRINITY\_DN21621\_c0\_g1\_i1.p1 EOG09370W6N  
TRINITY\_DN25093\_c0\_g1\_i1.p1 EOG09370W86  
TRINITY\_DN29701\_c0\_g1\_i1.p2 EOG09370WYG  
TRINITY\_DN29701\_c0\_g1\_i3.p1 EOG09370WYG  
TRINITY\_DN48061\_c0\_g1\_i1.p1 EOG09370X1T  
TRINITY\_DN21058\_c0\_g1\_i1.p1 EOG09370X1T  
TRINITY\_DN22010\_c0\_g1\_i1.p1 EOG09370Y63  
TRINITY\_DN23500\_c0\_g1\_i1.p1 EOG09370YCN  
TRINITY\_DN29305\_c0\_g1\_i1.p1 EOG09370ZOK  
TRINITY\_DN27008\_c0\_g1\_i1.p1 EOG09371088  
TRINITY\_DN22382\_c0\_g1\_i1.p2 EOG093710A7  
TRINITY\_DN26340\_c0\_g1\_i2.p1 EOG093710SY  
TRINITY\_DN15454\_c0\_g1\_i1.p1 EOG093710T1  
TRINITY\_DN17537\_c0\_g1\_i1.p2 EOG093710T1  
TRINITY\_DN38658\_c0\_g1\_i1.p1 EOG093710T1  
TRINITY\_DN27614\_c0\_g1\_i1.p1 EOG0937112Y  
TRINITY\_DN25748\_c0\_g1\_i2.p1 EOG093711LC  
TRINITY\_DN20450\_c0\_g1\_i1.p1 EOG093711QY  
TRINITY\_DN23793\_c0\_g1\_i1.p1 EOG093711ZO  
TRINITY\_DN27474\_c0\_g1\_i2.p1 EOG093711ZO  
TRINITY\_DN27474\_c0\_g1\_i4.p1 EOG093711ZO  
TRINITY\_DN30353\_c0\_g1\_i2.p1 EOG093711ZO  
TRINITY\_DN31081\_c0\_g2\_i1.p1 EOG0937129K  
TRINITY\_DN38134\_c0\_g1\_i1.p1 EOG0937133J  
TRINITY\_DN38162\_c0\_g1\_i1.p1 EOG0937133J  
TRINITY\_DN22311\_c0\_g1\_i1.p2 EOG09371431  
TRINITY\_DN31536\_c0\_g1\_i1.p1 EOG093714JU  
TRINITY\_DN25356\_c0\_g1\_i1.p1 EOG093701IQ  
TRINITY\_DN29309\_c0\_g1\_i3.p1 EOG093704Q0  
TRINITY\_DN32590\_c0\_g1\_i1.p1 EOG093709BZ  
TRINITY\_DN26086\_c0\_g1\_i1.p1 EOG09370CAV  
TRINITY\_DN30289\_c0\_g1\_i1.p1 EOG09370EHZ  
TRINITY\_DN24310\_c0\_g1\_i1.p1 EOG09371330
