# Supplementary material
Source: PubMed Central journal article supplement (PMC7490689)
Supplement: 41396_2020_698_MOESM6_ESM.pdf [file 41396_2020_698_MOESM6_ESM.pdf]

Supplementary Table 4. Genes belonging to glycoside hydrolase family (GH) or pectinase family (PL) in the transcriptome

\* Amino acids sequences are available at Dryad digital repository (<https://doi.org/10.5061/dryad.05.qftff04>)

| protein ID*                  | GH/PL family | TMM       |           |           |
|------------------------------|--------------|-----------|-----------|-----------|
|                              |              | Library 1 | Library 2 | Library 3 |
| TRINITY_DN16078_c0_g1_i1.p1  | GH1          | 7.297     | 8.118     | 5.374     |
| TRINITY_DN14948_c0_g1_i1.p1  | GH1          | 6.737     | 11.152    | 20.22     |
| TRINITY_DN1174_c0_g1_i1.p1   | GH1          | 0         | 0.316     | 0.109     |
| TRINITY_DN11547_c0_g1_i1.p1  | GH1          | 128.205   | 175.547   | 140.21    |
| TRINITY_DN7159_c0_g1_i1.p1   | GH10         | 15.705    | 11.977    | 15.512    |
| TRINITY_DN20420_c0_g1_i1.p1  | GH10         | 0         | 0.983     | 0         |
| TRINITY_DN17112_c0_g2_i1.p1  | GH10         | 2171.721  | 5341.223  | 4799.972  |
| TRINITY_DN17122_c0_g1_i1.p1  | GH115        | 4.777     | 8.883     | 3.431     |
| TRINITY_DN17121_c0_g1_i1.p1  | GH13         | 13.845    | 14.732    | 7.756     |
| TRINITY_DN17003_c0_g1_i3.p1  | GH133        | 20.997    | 35.034    | 17.291    |
| TRINITY_DN17340_c0_g1_i1.p1  | GH133        | 51.332    | 38.565    | 37.84     |
| TRINITY_DN17003_c0_g1_i3.p1  | GH13_25      | 20.997    | 35.034    | 17.291    |
| TRINITY_DN17340_c0_g1_i1.p1  | GH13_25      | 51.332    | 38.565    | 37.84     |
| TRINITY_DN12543_c0_g1_i1.p1  | GH13_31      | 0.452     | 0.862     | 2.108     |
| TRINITY_DN10109_c0_g1_i1.p1  | GH13_8       | 84.088    | 113.548   | 114.232   |
| TRINITY_DN17909_c3_g1_i9.p1  | GH14         | 1.535     | 1.493     | 1.095     |
| TRINITY_DN14171_c0_g1_i2.p1  | GH14         | 9.302     | 10.655    | 10.119    |
| TRINITY_DN11354_c0_g1_i3.p1  | GH14         | 8.598     | 5.813     | 6.506     |
| TRINITY_DN12370_c0_g1_i1.p1  | GH15         | 9.374     | 15.132    | 10.11     |
| TRINITY_DN12317_c0_g1_i3.p1  | GH19         | 10.539    | 11.225    | 17.081    |
| TRINITY_DN12317_c0_g1_i4.p1  | GH19         | 28.466    | 48.601    | 61.354    |
| TRINITY_DN16152_c0_g1_i5.p1  | GH2          | 2.782     | 15.108    | 10.785    |
| TRINITY_DN16152_c0_g1_i4.p1  | GH2          | 5.121     | 0         | 3.203     |
| TRINITY_DN16699_c0_g1_i2.p1  | GH2          | 15.542    | 64.413    | 26.936    |
| TRINITY_DN10065_c0_g1_i1.p1  | GH2          | 2.05      | 2.342     | 2.893     |
| TRINITY_DN12646_c0_g1_i1.p1  | GH2          | 2.917     | 4.672     | 3.121     |
| TRINITY_DN16699_c0_g1_i7.p1  | GH2          | 103.559   | 163.509   | 76.876    |
| TRINITY_DN10150_c0_g1_i3.p1  | GH2          | 0.208     | 1.42      | 0.812     |
| TRINITY_DN17234_c0_g2_i1.p1  | GH2          | 131.817   | 265.128   | 115.792   |
| TRINITY_DN18046_c3_g1_i8.p1  | GH2          | 2.222     | 14.683    | 1.204     |
| TRINITY_DN10587_c0_g1_i1.p1  | GH20         | 0.984     | 1.529     | 1.871     |
| TRINITY_DN17718_c0_g1_i3.p1  | GH20         | 1.129     | 2.257     | 2.929     |
| TRINITY_DN9032_c0_g1_i1.p1   | GH20         | 18.333    | 52.023    | 22        |
| TRINITY_DN12228_c0_g1_i1.p1  | GH25         | 0.75      | 0.631     | 1.095     |
| TRINITY_DN14026_c0_g1_i1.p1  | GH26         | 130.074   | 216.26    | 103.054   |
| TRINITY_DN16977_c0_g1_i5.p1  | GH26         | 269.568   | 674.725   | 344.749   |
| TRINITY_DN20388_c0_g1_i1.p1  | GH28         | 0         | 1.056     | 0         |
| TRINITY_DN15777_c0_g1_i5.p1  | GH3          | 60.309    | 78.077    | 51.317    |
| TRINITY_DN17842_c1_g1_i14.p1 | GH3          | 0.876     | 2.658     | 6.004     |
| TRINITY_DN17923_c8_g1_i4.p1  | GH3          | 55.107    | 30.362    | 0.392     |
| TRINITY_DN16835_c0_g1_i1.p1  | GH3          | 118.361   | 238.431   | 86.548    |
| TRINITY_DN17277_c0_g1_i1.p1  | GH3          | 5.175     | 3.119     | 4.097     |
| TRINITY_DN16979_c1_g1_i1.p1  | GH3          | 55.36     | 102.894   | 63.216    |
| TRINITY_DN13468_c0_g1_i1.p1  | GH3          | 6.791     | 9.732     | 16.935    |
| TRINITY_DN16979_c1_g2_i1.p1  | GH3          | 8.363     | 17.05     | 24.472    |
| TRINITY_DN16979_c1_g1_i4.p1  | GH3          | 193.797   | 978.831   | 641.621   |
| TRINITY_DN17842_c1_g1_i11.p1 | GH3          | 0.126     | 0.194     | 1.487     |
| TRINITY_DN17277_c0_g1_i2.p1  | GH3          | 26.777    | 18.482    | 13.897    |

|                             |         |          |          |          |
|-----------------------------|---------|----------|----------|----------|
| TRINITY_DN15607_c0_g1_i2.p1 | GH30    | 0.126    | 1.044    | 0        |
| TRINITY_DN15607_c0_g1_i1.p1 | GH30_2  | 1.291    | 2.973    | 4.462    |
| TRINITY_DN14529_c0_g1_i1.p1 | GH31    | 50.935   | 105.673  | 62.951   |
| TRINITY_DN8721_c0_g1_i1.p1  | GH31    | 6.412    | 6.917    | 10.284   |
| TRINITY_DN8173_c0_g1_i1.p1  | GH31    | 0.009    | 0.716    | 0.922    |
| TRINITY_DN16340_c0_g2_i1.p1 | GH31    | 1.436    | 4.915    | 3.011    |
| TRINITY_DN14404_c0_g1_i1.p1 | GH31    | 6.502    | 14.004   | 5.238    |
| TRINITY_DN14609_c0_g1_i1.p1 | GH31    | 4.705    | 4.551    | 2.637    |
| TRINITY_DN12768_c0_g1_i1.p1 | GH31    | 0.939    | 2.937    | 3.413    |
| TRINITY_DN16116_c0_g1_i4.p1 | GH31    | 0.533    | 3.641    | 1.232    |
| TRINITY_DN12327_c0_g1_i3.p1 | GH31    | 0.912    | 2.779    | 3.641    |
| TRINITY_DN14609_c1_g1_i1.p1 | GH31    | 0.397    | 2.573    | 3.248    |
| TRINITY_DN12011_c0_g1_i1.p1 | GH36    | 73.702   | 182.221  | 153.715  |
| TRINITY_DN12249_c0_g1_i1.p1 | GH38    | 7.83     | 10.448   | 3.495    |
| TRINITY_DN14317_c0_g1_i1.p1 | GH38    | 1.156    | 4.259    | 0.593    |
| TRINITY_DN9869_c0_g1_i1.p1  | GH43_12 | 15.931   | 49.669   | 37.283   |
| TRINITY_DN16708_c1_g2_i1.p1 | GH43_17 | 0.226    | 1.687    | 0.082    |
| TRINITY_DN11521_c0_g1_i1.p1 | GH43_17 | 0.063    | 1.845    | 1.524    |
| TRINITY_DN6572_c0_g1_i1.p1  | GH45    | 42.654   | 94.69    | 106.23   |
| TRINITY_DN17282_c0_g2_i1.p1 | GH45    | 778.467  | 1480.169 | 1488.374 |
| TRINITY_DN16049_c0_g1_i1.p1 | GH47    | 3.025    | 5.182    | 7.3      |
| TRINITY_DN9573_c0_g1_i1.p1  | GH47    | 0.542    | 2.112    | 7.446    |
| TRINITY_DN11040_c0_g1_i1.p1 | GH53    | 95.892   | 193.956  | 150.101  |
| TRINITY_DN13014_c0_g1_i1.p1 | GH55    | 46.889   | 107.772  | 29.153   |
| TRINITY_DN16353_c0_g1_i1.p1 | GH57    | 8.11     | 9.308    | 16.552   |
| TRINITY_DN14804_c3_g1_i1.p1 | GH5_1   | 77.721   | 80.529   | 105.773  |
| TRINITY_DN12526_c0_g1_i1.p1 | GH5_1   | 65.231   | 90.613   | 84.686   |
| TRINITY_DN14804_c3_g3_i1.p1 | GH5_1   | 63.66    | 119.009  | 128.001  |
| TRINITY_DN14804_c1_g2_i1.p1 | GH5_1   | 48.894   | 78.247   | 80.297   |
| TRINITY_DN13223_c0_g1_i2.p1 | GH5_1   | 24.817   | 34.609   | 32.466   |
| TRINITY_DN14804_c1_g1_i1.p1 | GH5_1   | 34.327   | 56.987   | 85.325   |
| TRINITY_DN10727_c0_g1_i1.p1 | GH5_1   | 125.73   | 302.213  | 125.711  |
| TRINITY_DN14804_c4_g1_i2.p1 | GH5_1   | 224.954  | 392.413  | 628.627  |
| TRINITY_DN15190_c0_g1_i1.p1 | GH5_1   | 62.576   | 193.81   | 199.867  |
| TRINITY_DN17591_c1_g1_i1.p1 | GH5_2   | 10.973   | 42.691   | 45.468   |
| TRINITY_DN17591_c1_g1_i3.p1 | GH5_2   | 7.414    | 63.212   | 44.355   |
| TRINITY_DN17054_c0_g1_i1.p1 | GH5_2   | 534.168  | 951.381  | 739.255  |
| TRINITY_DN16418_c0_g2_i3.p1 | GH5_2   | 1820.17  | 2451.451 | 2432.324 |
| TRINITY_DN5923_c0_g1_i1.p1  | GH5_2   | 36.621   | 68.782   | 50.724   |
| TRINITY_DN16418_c0_g3_i1.p1 | GH5_2   | 479.097  | 943.36   | 984.773  |
| TRINITY_DN9996_c0_g1_i1.p1  | GH5_2   | 13.077   | 9.829    | 14.235   |
| TRINITY_DN17591_c1_g1_i8.p1 | GH5_2   | 12.77    | 94.872   | 36.125   |
| TRINITY_DN17114_c0_g2_i1.p1 | GH5_2   | 1348.081 | 2786.004 | 3305.895 |
| TRINITY_DN17591_c1_g1_i4.p1 | GH5_2   | 34.815   | 193.604  | 127.718  |
| TRINITY_DN15138_c2_g2_i1.p1 | GH5_2   | 349.339  | 385.666  | 573.843  |
| TRINITY_DN6853_c0_g1_i1.p1  | GH5_2   | 128.412  | 277.409  | 306.882  |
| TRINITY_DN7937_c0_g1_i1.p1  | GH5_2   | 62.63    | 62.023   | 74.211   |
| TRINITY_DN14479_c0_g1_i2.p1 | GH5_4   | 129.189  | 249.34   | 190.387  |
| TRINITY_DN14479_c0_g1_i3.p1 | GH5_4   | 54.557   | 217.765  | 197.905  |
| TRINITY_DN7032_c0_g1_i1.p2  | GH63    | 0.144    | 1.226    | 0.109    |
| TRINITY_DN16554_c0_g3_i2.p1 | GH67    | 31.834   | 22.219   | 12.556   |
| TRINITY_DN16554_c0_g3_i3.p1 | GH67    | 0        | 0        | 0.128    |

|                             |      |           |           |           |
|-----------------------------|------|-----------|-----------|-----------|
| TRINITY_DN13801_c0_g1_i1.p1 | GH7  | 132.774   | 242.326   | 313.242   |
| TRINITY_DN13801_c1_g5_i1.p1 | GH7  | 57.862    | 56.271    | 57.723    |
| TRINITY_DN13801_c1_g4_i1.p1 | GH7  | 48.831    | 162.392   | 62.112    |
| TRINITY_DN13801_c1_g6_i1.p1 | GH7  | 31.925    | 35.847    | 88.573    |
| TRINITY_DN13801_c1_g3_i1.p1 | GH7  | 2.339     | 5.461     | 6.241     |
| TRINITY_DN14810_c0_g2_i1.p1 | GH7  | 63.109    | 196.067   | 97.26     |
| TRINITY_DN14810_c1_g2_i1.p1 | GH7  | 161.565   | 272.834   | 288.149   |
| TRINITY_DN17417_c2_g1_i4.p1 | GH7  | 10115.741 | 32116.715 | 24090.294 |
| TRINITY_DN13801_c1_g2_i1.p1 | GH7  | 26.289    | 121.873   | 64.192    |
| TRINITY_DN12110_c0_g1_i1.p1 | GH77 | 2.655     | 1.056     | 0.347     |
| TRINITY_DN17673_c1_g3_i1.p1 | GH77 | 14.594    | 8.567     | 7.218     |
| TRINITY_DN13925_c0_g1_i1.p1 | GH77 | 2.745     | 1.76      | 2.245     |
| TRINITY_DN16709_c0_g1_i4.p1 | GH8  | 424.332   | 1106.395  | 901.711   |
| TRINITY_DN12784_c0_g1_i1.p1 | GH87 | 3.025     | 7.657     | 4.079     |
| TRINITY_DN11846_c0_g1_i1.p1 | GH92 | 4.696     | 6.153     | 1.624     |
| TRINITY_DN10686_c0_g2_i1.p1 | GH92 | 0.172     | 0.024     | 1.314     |
| TRINITY_DN18029_c6_g1_i4.p1 | GH92 | 3.621     | 3.75      | 2.391     |
| TRINITY_DN14316_c0_g1_i1.p1 | GH95 | 8.281     | 14.963    | 3.057     |
| TRINITY_DN7344_c0_g1_i1.p1  | GH99 | 2.511     | 3.434     | 2.163     |

**b *Holomastigotoides hartmanni***

| Protein ID*                  | GH/PL family | TMM       |           |           |
|------------------------------|--------------|-----------|-----------|-----------|
|                              |              | Library 1 | Library 2 | Library 3 |
| TRINITY_DN153639_c0_g1_i1.p1 | GH1          | 0.59      | 0         | 0         |
| TRINITY_DN2815_c0_g1_i1.p2   | GH1          | 0.953     | 0         | 0.027     |
| TRINITY_DN88655_c0_g1_i1.p1  | GH1          | 8.701     | 3.369     | 10.001    |
| TRINITY_DN73192_c0_g2_i1.p1  | GH10         | 1.146     | 0         | 0         |
| TRINITY_DN121085_c0_g1_i1.p1 | GH10         | 2.62      | 0         | 0         |
| TRINITY_DN77572_c0_g1_i1.p3  | GH10         | 7.147     | 0         | 0         |
| TRINITY_DN77572_c0_g2_i1.p2  | GH10         | 2.847     | 0         | 0         |
| TRINITY_DN80113_c0_g1_i1.p2  | GH102        | 6.636     | 0         | 0         |
| TRINITY_DN95421_c0_g2_i2.p1  | GH105        | 1.702     | 0.274     | 0.018     |
| TRINITY_DN106147_c0_g1_i1.p2 | GH105        | 0.352     | 0.509     | 0.216     |
| TRINITY_DN79265_c0_g2_i1.p1  | GH105        | 1.815     | 0         | 0         |
| TRINITY_DN95421_c0_g2_i9.p1  | GH105        | 0.93      | 3.232     | 0         |
| TRINITY_DN98632_c0_g1_i1.p1  | GH109        | 3.494     | 0         | 0         |
| TRINITY_DN10950_c0_g1_i1.p1  | GH109        | 5.99      | 0         | 0         |
| TRINITY_DN80416_c0_g1_i1.p1  | GH109        | 7.907     | 0         | 0         |
| TRINITY_DN92896_c2_g1_i11.p1 | GH109        | 15.02     | 0.029     | 0.009     |
| TRINITY_DN90436_c0_g1_i1.p2  | GH109        | 2.019     | 0         | 0         |
| TRINITY_DN69232_c0_g1_i1.p1  | GH109        | 4.05      | 0         | 0         |
| TRINITY_DN69222_c0_g2_i1.p1  | GH109        | 0.828     | 0         | 0         |
| TRINITY_DN46367_c0_g1_i1.p2  | GH109        | 4.833     | 0         | 0         |
| TRINITY_DN80461_c0_g1_i1.p1  | GH109        | 3.925     | 0         | 0         |
| TRINITY_DN96145_c0_g3_i1.p1  | GH11         | 263.546   | 327.452   | 274.694   |
| TRINITY_DN37855_c0_g2_i1.p1  | GH113        | 0         | 0         | 0.684     |
| TRINITY_DN120830_c0_g1_i1.p1 | GH120        | 4.515     | 0         | 0         |
| TRINITY_DN138004_c0_g1_i1.p1 | GH125        | 2.995     | 0         | 0         |
| TRINITY_DN87680_c0_g1_i1.p1  | GH125        | 0.068     | 0.382     | 0.756     |
| TRINITY_DN151709_c0_g1_i1.p1 | GH128        | 1.293     | 0         | 0         |
| TRINITY_DN32897_c0_g2_i1.p2  | GH13         | 1.373     | 0         | 0         |
| TRINITY_DN91066_c0_g3_i3.p1  | GH13         | 0.261     | 4.495     | 1.926     |
| TRINITY_DN74300_c0_g1_i1.p1  | GH13         | 1.248     | 0         | 0         |

|                              |         |         |         |         |
|------------------------------|---------|---------|---------|---------|
| TRINITY_DN13431_c0_g1_i1.p1  | GH13    | 3.993   | 0       | 0       |
| TRINITY_DN78372_c0_g1_i2.p1  | GH13    | 5.729   | 0       | 0       |
| TRINITY_DN78372_c0_g1_i1.p1  | GH13    | 4.413   | 0       | 0       |
| TRINITY_DN92622_c2_g1_i1.p1  | GH13    | 0.658   | 0.196   | 0       |
| TRINITY_DN95286_c1_g2_i1.p1  | GH13    | 8.179   | 0.029   | 0.018   |
| TRINITY_DN91675_c4_g2_i1.p1  | GH13    | 1.168   | 0       | 0       |
| TRINITY_DN58691_c0_g1_i1.p2  | GH130   | 1.497   | 0       | 0       |
| TRINITY_DN72979_c0_g1_i1.p2  | GH130   | 5.57    | 0       | 0       |
| TRINITY_DN93222_c0_g2_i1.p1  | GH130   | 0.147   | 2.419   | 0.225   |
| TRINITY_DN74709_c0_g1_i1.p1  | GH130   | 9.54    | 0       | 0       |
| TRINITY_DN93086_c1_g1_i1.p7  | GH130   | 7.272   | 0       | 0       |
| TRINITY_DN87835_c0_g1_i1.p1  | GH133   | 43.21   | 187.38  | 126.459 |
| TRINITY_DN84431_c0_g1_i1.p1  | GH133   | 14.396  | 0       | 0       |
| TRINITY_DN64213_c0_g1_i1.p1  | GH133   | 5.4     | 0       | 0       |
| TRINITY_DN93852_c0_g1_i2.p1  | GH136   | 9.722   | 0.304   | 0.009   |
| TRINITY_DN95706_c0_g2_i3.p1  | GH136   | 9.858   | 0.01    | 0.009   |
| TRINITY_DN67003_c0_g1_i1.p1  | GH136   | 5.944   | 0       | 0       |
| TRINITY_DN95706_c0_g2_i11.p1 | GH136   | 5.343   | 0       | 0       |
| TRINITY_DN92622_c0_g1_i1.p1  | GH13_11 | 4.254   | 0       | 0       |
| TRINITY_DN73110_c0_g1_i1.p1  | GH13_11 | 0       | 0       | 1.179   |
| TRINITY_DN34779_c0_g1_i1.p2  | GH13_14 | 1.486   | 0       | 0       |
| TRINITY_DN93352_c2_g1_i6.p1  | GH13_20 | 0.045   | 0.01    | 0.252   |
| TRINITY_DN93352_c2_g1_i5.p1  | GH13_20 | 2.825   | 0       | 0       |
| TRINITY_DN149940_c0_g1_i1.p1 | GH13_20 | 1.044   | 0       | 0       |
| TRINITY_DN90766_c1_g4_i2.p1  | GH13_23 | 0       | 1.018   | 0       |
| TRINITY_DN87835_c0_g1_i1.p1  | GH13_25 | 43.21   | 187.38  | 126.459 |
| TRINITY_DN93254_c1_g2_i2.p1  | GH13_30 | 3.664   | 0.02    | 0       |
| TRINITY_DN87950_c0_g3_i1.p1  | GH13_36 | 2.416   | 0       | 0       |
| TRINITY_DN87950_c0_g2_i1.p1  | GH13_36 | 3.982   | 0       | 0       |
| TRINITY_DN64786_c0_g1_i1.p1  | GH13_41 | 1.883   | 0       | 0       |
| TRINITY_DN33167_c0_g1_i1.p1  | GH13_8  | 3.324   | 0.372   | 0       |
| TRINITY_DN72223_c0_g1_i1.p1  | GH142   | 2.598   | 0       | 0       |
| TRINITY_DN91967_c1_g6_i1.p2  | GH142   | 1.531   | 0       | 0       |
| TRINITY_DN91967_c1_g8_i2.p1  | GH142   | 0.726   | 0       | 0       |
| TRINITY_DN11190_c0_g1_i1.p1  | GH146   | 5.956   | 0       | 0       |
| TRINITY_DN132057_c0_g1_i1.p1 | GH151   | 1.668   | 0       | 0       |
| TRINITY_DN80642_c0_g1_i2.p1  | GH154   | 1.86    | 1.665   | 4.681   |
| TRINITY_DN74062_c0_g1_i1.p2  | GH154   | 1.509   | 0       | 0       |
| TRINITY_DN63217_c0_g1_i1.p1  | GH154   | 0.715   | 0       | 0       |
| TRINITY_DN81791_c0_g1_i1.p1  | GH158   | 112.477 | 66.795  | 1.485   |
| TRINITY_DN94378_c0_g1_i2.p3  | GH16    | 9.461   | 0.088   | 0       |
| TRINITY_DN67849_c0_g1_i1.p1  | GH16    | 0       | 1.665   | 0.018   |
| TRINITY_DN94865_c1_g1_i2.p1  | GH18    | 17.504  | 47.376  | 48.764  |
| TRINITY_DN94865_c1_g1_i4.p1  | GH18    | 0.227   | 6.757   | 0.549   |
| TRINITY_DN86382_c0_g1_i1.p1  | GH19    | 0.216   | 2.487   | 0       |
| TRINITY_DN94836_c0_g2_i4.p1  | GH19    | 52.024  | 0.098   | 0.045   |
| TRINITY_DN99361_c0_g1_i1.p1  | GH2     | 3.607   | 0       | 0       |
| TRINITY_DN92140_c1_g1_i1.p1  | GH2     | 63.47   | 119.899 | 30.454  |
| TRINITY_DN95854_c0_g1_i6.p1  | GH2     | 87.69   | 0       | 0.027   |
| TRINITY_DN96885_c1_g5_i1.p1  | GH2     | 2.416   | 0       | 0       |
| TRINITY_DN76641_c0_g1_i2.p1  | GH2     | 1.01    | 0       | 0       |
| TRINITY_DN80649_c0_g1_i1.p1  | GH2     | 1.373   | 0       | 0       |

|                              |      |        |         |        |
|------------------------------|------|--------|---------|--------|
| TRINITY_DN94482_c1_g6_i2.p1  | GH2  | 1.668  | 0       | 0      |
| TRINITY_DN76641_c0_g1_i1.p1  | GH2  | 1.52   | 0       | 0      |
| TRINITY_DN70688_c0_g1_i1.p1  | GH2  | 4.084  | 0       | 0      |
| TRINITY_DN90967_c0_g1_i2.p1  | GH2  | 2.11   | 0       | 0      |
| TRINITY_DN34596_c0_g1_i1.p1  | GH2  | 1.838  | 0       | 0      |
| TRINITY_DN89968_c1_g2_i3.p1  | GH2  | 3.97   | 0       | 0      |
| TRINITY_DN77753_c0_g1_i1.p1  | GH2  | 0.76   | 1.263   | 0      |
| TRINITY_DN118384_c0_g1_i1.p1 | GH20 | 1.441  | 0       | 0      |
| TRINITY_DN77704_c0_g1_i2.p1  | GH20 | 3.562  | 0       | 0      |
| TRINITY_DN77457_c0_g1_i1.p1  | GH20 | 0.681  | 0.989   | 0      |
| TRINITY_DN90846_c0_g1_i1.p1  | GH20 | 84.434 | 176.999 | 78.893 |
| TRINITY_DN88123_c0_g1_i1.p1  | GH20 | 5.944  | 23.815  | 9.947  |
| TRINITY_DN147347_c0_g1_i1.p1 | GH20 | 2.201  | 0       | 0      |
| TRINITY_DN118515_c0_g1_i1.p2 | GH20 | 1.021  | 0       | 0      |
| TRINITY_DN32197_c0_g1_i1.p1  | GH20 | 0      | 0.088   | 0.963  |
| TRINITY_DN98026_c0_g1_i1.p1  | GH24 | 0.363  | 0       | 0.135  |
| TRINITY_DN92332_c0_g2_i2.p1  | GH27 | 2.893  | 3.016   | 0      |
| TRINITY_DN88449_c1_g4_i2.p1  | GH27 | 1.429  | 0       | 0      |
| TRINITY_DN91590_c2_g2_i1.p1  | GH27 | 0.783  | 0       | 0      |
| TRINITY_DN92332_c0_g2_i7.p1  | GH27 | 0.034  | 0       | 8.255  |
| TRINITY_DN92332_c0_g2_i1.p1  | GH27 | 0      | 0.382   | 0      |
| TRINITY_DN91561_c0_g1_i1.p1  | GH28 | 91.467 | 2.526   | 0.054  |
| TRINITY_DN91561_c0_g8_i2.p1  | GH28 | 1.339  | 0       | 0      |
| TRINITY_DN7877_c0_g1_i1.p2   | GH29 | 0      | 2.027   | 0      |
| TRINITY_DN78948_c0_g1_i1.p1  | GH29 | 3.744  | 0       | 0      |
| TRINITY_DN73182_c0_g1_i1.p1  | GH29 | 5.071  | 0.255   | 0      |
| TRINITY_DN95455_c0_g2_i1.p1  | GH29 | 5.071  | 0       | 0      |
| TRINITY_DN74082_c0_g2_i1.p1  | GH29 | 0.76   | 0       | 0      |
| TRINITY_DN95420_c0_g6_i1.p1  | GH29 | 0.964  | 0       | 0      |
| TRINITY_DN10416_c0_g1_i1.p1  | GH29 | 3.789  | 0       | 0.054  |
| TRINITY_DN81650_c0_g1_i1.p1  | GH29 | 5.059  | 0       | 0      |
| TRINITY_DN91799_c2_g1_i1.p2  | GH29 | 3.494  | 0       | 0      |
| TRINITY_DN131032_c0_g1_i1.p1 | GH29 | 0.771  | 0       | 0      |
| TRINITY_DN91799_c2_g3_i1.p1  | GH29 | 2.609  | 0       | 0      |
| TRINITY_DN82169_c0_g1_i1.p1  | GH29 | 2.552  | 0       | 0      |
| TRINITY_DN75483_c0_g1_i1.p1  | GH3  | 2.666  | 0       | 0      |
| TRINITY_DN166364_c0_g1_i1.p1 | GH3  | 1.168  | 0       | 0      |
| TRINITY_DN84345_c2_g1_i4.p2  | GH3  | 1.645  | 0.304   | 1.368  |
| TRINITY_DN95428_c0_g1_i4.p2  | GH3  | 14.997 | 0.029   | 0      |
| TRINITY_DN93744_c1_g4_i2.p1  | GH3  | 1.327  | 0       | 0      |
| TRINITY_DN84345_c2_g1_i3.p2  | GH3  | 3.381  | 0       | 0.108  |
| TRINITY_DN87767_c0_g2_i1.p1  | GH3  | 1.225  | 9.234   | 7.634  |
| TRINITY_DN75483_c1_g2_i1.p1  | GH3  | 1.339  | 0       | 0      |
| TRINITY_DN162387_c0_g1_i1.p2 | GH3  | 1.951  | 0       | 0      |
| TRINITY_DN7921_c0_g1_i1.p1   | GH3  | 1.656  | 0       | 0      |
| TRINITY_DN75483_c1_g1_i1.p1  | GH3  | 0.817  | 0       | 0      |
| TRINITY_DN87959_c0_g1_i1.p1  | GH3  | 1.316  | 0       | 0      |
| TRINITY_DN87959_c0_g1_i2.p1  | GH3  | 2.983  | 0       | 0      |
| TRINITY_DN75140_c0_g1_i1.p1  | GH3  | 4.572  | 0       | 0      |
| TRINITY_DN93442_c0_g1_i2.p1  | GH3  | 1.883  | 0       | 0      |
| TRINITY_DN89215_c0_g1_i1.p1  | GH3  | 20.124 | 33.706  | 35.828 |
| TRINITY_DN4941_c0_g1_i1.p1   | GH3  | 0      | 1.146   | 0      |

|                              |        |         |         |        |
|------------------------------|--------|---------|---------|--------|
| TRINITY_DN77607_c0_g2_i1.p2  | GH3    | 3.868   | 0       | 0      |
| TRINITY_DN89215_c0_g1_i2.p1  | GH3    | 154.688 | 132.639 | 1.926  |
| TRINITY_DN90827_c0_g1_i1.p1  | GH3    | 1.202   | 0.069   | 11.982 |
| TRINITY_DN90827_c0_g1_i4.p1  | GH3    | 6.046   | 12.495  | 0.171  |
| TRINITY_DN22201_c0_g1_i1.p2  | GH3    | 1.645   | 0       | 0      |
| TRINITY_DN86230_c0_g1_i1.p1  | GH3    | 1.894   | 6.443   | 19.876 |
| TRINITY_DN56581_c0_g1_i1.p1  | GH3    | 0.681   | 0       | 0      |
| TRINITY_DN90207_c0_g3_i4.p1  | GH3    | 0       | 0.362   | 0      |
| TRINITY_DN125135_c0_g1_i1.p1 | GH3    | 1.894   | 0       | 0      |
| TRINITY_DN90794_c0_g1_i7.p1  | GH3    | 2.053   | 10.243  | 0.432  |
| TRINITY_DN141476_c0_g1_i1.p2 | GH3    | 0.908   | 0       | 0      |
| TRINITY_DN86008_c0_g1_i3.p3  | GH3    | 1.089   | 69.576  | 24.845 |
| TRINITY_DN34613_c0_g2_i1.p1  | GH3    | 1.01    | 0       | 0      |
| TRINITY_DN87959_c0_g2_i1.p1  | GH3    | 1.463   | 0       | 0      |
| TRINITY_DN86306_c0_g1_i1.p1  | GH3    | 5.15    | 2.242   | 12.495 |
| TRINITY_DN86824_c0_g1_i1.p1  | GH3    | 18.57   | 14.796  | 7.265  |
| TRINITY_DN83622_c0_g1_i1.p1  | GH3    | 4.288   | 0       | 0      |
| TRINITY_DN76719_c0_g4_i1.p2  | GH3    | 0       | 1.498   | 0.027  |
| TRINITY_DN40688_c0_g1_i1.p1  | GH3    | 3.857   | 0       | 0      |
| TRINITY_DN41780_c0_g1_i1.p1  | GH3    | 0       | 0.852   | 0      |
| TRINITY_DN82057_c0_g3_i1.p1  | GH3    | 2.405   | 0       | 0      |
| TRINITY_DN81018_c0_g4_i1.p1  | GH3    | 1.634   | 0       | 0      |
| TRINITY_DN81018_c0_g1_i1.p1  | GH3    | 0.136   | 0       | 1.728  |
| TRINITY_DN81018_c0_g2_i3.p1  | GH3    | 2.087   | 0.088   | 0      |
| TRINITY_DN82057_c0_g1_i1.p1  | GH3    | 1.611   | 0       | 0      |
| TRINITY_DN82057_c0_g2_i1.p1  | GH3    | 1.112   | 0       | 0      |
| TRINITY_DN94174_c0_g2_i1.p2  | GH30_1 | 15.609  | 0.01    | 0      |
| TRINITY_DN51086_c0_g1_i1.p2  | GH30_8 | 2.019   | 0       | 0      |
| TRINITY_DN96192_c0_g3_i1.p1  | GH31   | 13.749  | 0       | 0      |
| TRINITY_DN82356_c0_g1_i1.p1  | GH31   | 4.095   | 0.627   | 0      |
| TRINITY_DN96138_c0_g1_i1.p1  | GH31   | 12.047  | 0       | 0      |
| TRINITY_DN74621_c0_g1_i1.p1  | GH31   | 2.995   | 0       | 0      |
| TRINITY_DN89688_c2_g3_i2.p1  | GH31   | 0       | 0       | 0.585  |
| TRINITY_DN69636_c0_g1_i1.p1  | GH31   | 2.564   | 0       | 0      |
| TRINITY_DN96138_c0_g2_i1.p1  | GH31   | 19.103  | 0       | 0      |
| TRINITY_DN87726_c0_g2_i1.p1  | GH31   | 1.044   | 2.164   | 15.474 |
| TRINITY_DN76261_c0_g1_i1.p1  | GH31   | 7.056   | 0       | 0      |
| TRINITY_DN90634_c0_g1_i1.p1  | GH31   | 13.545  | 24.031  | 34.685 |
| TRINITY_DN91022_c0_g1_i1.p1  | GH31   | 11.775  | 12.172  | 4.591  |
| TRINITY_DN93454_c0_g1_i1.p1  | GH31   | 9.756   | 29.72   | 6.715  |
| TRINITY_DN89688_c2_g3_i1.p1  | GH31   | 1.758   | 0       | 5.968  |
| TRINITY_DN71526_c0_g1_i1.p1  | GH32   | 5.298   | 0       | 0      |
| TRINITY_DN96167_c2_g1_i1.p1  | GH33   | 2.836   | 0       | 0      |
| TRINITY_DN96167_c3_g1_i8.p1  | GH33   | 5.071   | 0       | 0.036  |
| TRINITY_DN95659_c2_g2_i1.p1  | GH33   | 1.032   | 0       | 0      |
| TRINITY_DN151903_c0_g1_i1.p1 | GH33   | 0       | 4.005   | 0      |
| TRINITY_DN92263_c4_g1_i4.p1  | GH33   | 0.613   | 0       | 0      |
| TRINITY_DN96116_c1_g2_i1.p1  | GH33   | 7.487   | 0       | 0      |
| TRINITY_DN77363_c0_g1_i1.p1  | GH33   | 4.708   | 0       | 0      |
| TRINITY_DN91152_c6_g1_i2.p1  | GH33   | 7.589   | 0       | 0      |
| TRINITY_DN95279_c1_g4_i1.p1  | GH33   | 8.372   | 0.02    | 0      |
| TRINITY_DN96167_c3_g1_i1.p1  | GH33   | 1.565   | 0       | 0.648  |

|                              |         |         |         |         |
|------------------------------|---------|---------|---------|---------|
| TRINITY_DN91152_c6_g1_i3.p1  | GH33    | 2.552   | 0       | 0       |
| TRINITY_DN78972_c0_g1_i2.p1  | GH33    | 0.182   | 1.322   | 0       |
| TRINITY_DN79575_c0_g1_i1.p1  | GH33    | 7.805   | 0       | 0       |
| TRINITY_DN92263_c4_g1_i1.p1  | GH33    | 0.476   | 0       | 0       |
| TRINITY_DN95279_c1_g7_i1.p1  | GH33    | 2.201   | 0       | 0       |
| TRINITY_DN96167_c5_g1_i1.p1  | GH33    | 0.885   | 0       | 0       |
| TRINITY_DN93406_c1_g1_i1.p2  | GH33    | 1.361   | 0       | 0       |
| TRINITY_DN92502_c0_g2_i1.p1  | GH33    | 1.486   | 0       | 0.018   |
| TRINITY_DN92263_c4_g1_i7.p1  | GH33    | 5.888   | 0       | 0       |
| TRINITY_DN95659_c2_g4_i2.p1  | GH33    | 0.397   | 6.669   | 0       |
| TRINITY_DN95659_c2_g1_i2.p1  | GH33    | 1.906   | 0       | 0       |
| TRINITY_DN94610_c5_g2_i4.p1  | GH33    | 0.42    | 0.431   | 0       |
| TRINITY_DN3453_c0_g1_i2.p1   | GH33    | 3.959   | 0       | 0       |
| TRINITY_DN93641_c2_g1_i1.p1  | GH33    | 2.689   | 0       | 0       |
| TRINITY_DN83847_c0_g1_i1.p1  | GH33    | 7.442   | 0       | 0       |
| TRINITY_DN93130_c2_g1_i1.p1  | GH33    | 0       | 0.754   | 1.485   |
| TRINITY_DN96116_c1_g1_i1.p1  | GH33    | 0.93    | 0       | 0       |
| TRINITY_DN93800_c2_g3_i1.p1  | GH33    | 2.904   | 0       | 0       |
| TRINITY_DN94907_c0_g1_i2.p1  | GH35    | 167.688 | 412.401 | 176.429 |
| TRINITY_DN94576_c2_g1_i2.p1  | GH35    | 0       | 0.989   | 0       |
| TRINITY_DN94576_c2_g1_i5.p1  | GH35    | 4.787   | 0.685   | 0       |
| TRINITY_DN94576_c2_g1_i3.p1  | GH35    | 0       | 0       | 1.395   |
| TRINITY_DN88285_c0_g1_i1.p2  | GH35    | 21.826  | 19.928  | 14.754  |
| TRINITY_DN94907_c0_g2_i1.p1  | GH35    | 0       | 1.41    | 2.341   |
| TRINITY_DN89603_c0_g1_i1.p2  | GH35    | 207.359 | 760.975 | 286.415 |
| TRINITY_DN94907_c0_g2_i3.p1  | GH35    | 0       | 0       | 0.162   |
| TRINITY_DN94907_c0_g2_i2.p1  | GH35    | 0.034   | 1.244   | 3.025   |
| TRINITY_DN72623_c0_g1_i1.p1  | GH35    | 5.128   | 0       | 0       |
| TRINITY_DN90516_c3_g5_i1.p1  | GH36    | 4.617   | 0.46    | 0       |
| TRINITY_DN65784_c0_g2_i1.p1  | GH36    | 0.737   | 0       | 0       |
| TRINITY_DN42059_c0_g1_i1.p1  | GH36    | 0.227   | 0       | 1.224   |
| TRINITY_DN91320_c0_g1_i1.p1  | GH36    | 1.044   | 0       | 0       |
| TRINITY_DN91524_c0_g2_i5.p1  | GH38    | 0       | 0       | 1.314   |
| TRINITY_DN109982_c0_g1_i1.p1 | GH38    | 0.919   | 0       | 0       |
| TRINITY_DN89351_c0_g8_i3.p1  | GH38    | 0       | 2.458   | 0.207   |
| TRINITY_DN89351_c0_g9_i1.p1  | GH38    | 1.804   | 0       | 0       |
| TRINITY_DN92787_c0_g2_i1.p1  | GH38    | 6.943   | 0.284   | 0       |
| TRINITY_DN79628_c0_g1_i1.p1  | GH39    | 3.641   | 0       | 0       |
| TRINITY_DN78358_c0_g4_i1.p1  | GH4     | 0.805   | 0       | 0       |
| TRINITY_DN66325_c0_g1_i1.p1  | GH4     | 1.18    | 0       | 0       |
| TRINITY_DN73565_c0_g2_i1.p1  | GH4     | 0       | 0.999   | 0.261   |
| TRINITY_DN34818_c0_g1_i1.p1  | GH4     | 0       | 0.862   | 0.306   |
| TRINITY_DN71789_c0_g1_i2.p1  | GH4     | 3.8     | 0       | 0       |
| TRINITY_DN78358_c0_g5_i1.p1  | GH4     | 1.951   | 0       | 0       |
| TRINITY_DN78358_c0_g4_i2.p1  | GH4     | 1.214   | 0       | 0       |
| TRINITY_DN78358_c0_g3_i1.p1  | GH4     | 1.089   | 0       | 0       |
| TRINITY_DN94488_c0_g3_i1.p1  | GH42    | 1.032   | 0       | 0       |
| TRINITY_DN91317_c5_g10_i1.p1 | GH42    | 0.579   | 0.029   | 0       |
| TRINITY_DN95075_c0_g1_i1.p1  | GH43_11 | 6.08    | 0       | 0       |
| TRINITY_DN85827_c2_g1_i1.p1  | GH43_11 | 3.687   | 0.059   | 0       |
| TRINITY_DN95493_c0_g1_i2.p2  | GH43_17 | 6.67    | 0       | 0.009   |
| TRINITY_DN95493_c0_g1_i6.p1  | GH43_17 | 1.86    | 0.108   | 0.18    |

|                              |         |          |          |          |
|------------------------------|---------|----------|----------|----------|
| TRINITY_DN90865_c2_g1_i1.p1  | GH43_17 | 7.067    | 0        | 0.027    |
| TRINITY_DN92126_c1_g1_i1.p1  | GH43_2  | 10.448   | 44.419   | 17.59    |
| TRINITY_DN95411_c0_g1_i1.p1  | GH43_24 | 30.277   | 0.02     | 0        |
| TRINITY_DN81430_c0_g2_i1.p3  | GH47    | 1.01     | 0.793    | 0.864    |
| TRINITY_DN83398_c0_g1_i1.p1  | GH51    | 0        | 0.519    | 0        |
| TRINITY_DN83398_c0_g1_i2.p1  | GH51    | 0.374    | 0.637    | 0        |
| TRINITY_DN95858_c0_g2_i2.p1  | GH53    | 116.674  | 73.434   | 75.4     |
| TRINITY_DN95858_c0_g1_i3.p1  | GH53    | 44.684   | 99.345   | 53.985   |
| TRINITY_DN84930_c0_g1_i1.p1  | GH57    | 3.12     | 0        | 0        |
| TRINITY_DN61821_c0_g1_i1.p1  | GH57    | 8.349    | 0        | 0        |
| TRINITY_DN133623_c0_g1_i1.p1 | GH57    | 2.167    | 0        | 0        |
| TRINITY_DN76599_c0_g1_i1.p1  | GH57    | 1.917    | 0        | 0        |
| TRINITY_DN80010_c0_g1_i1.p1  | GH57    | 2.099    | 0        | 0        |
| TRINITY_DN79441_c0_g1_i1.p1  | GH5_1   | 1.339    | 53.966   | 5.662    |
| TRINITY_DN93940_c0_g1_i6.p2  | GH5_1   | 6.137    | 13.68    | 19.156   |
| TRINITY_DN93940_c0_g2_i3.p1  | GH5_1   | 0        | 0.284    | 0.819    |
| TRINITY_DN93940_c0_g3_i1.p2  | GH5_1   | 1.407    | 15.315   | 1.233    |
| TRINITY_DN133819_c0_g1_i1.p1 | GH5_13  | 0        | 0.245    | 0.207    |
| TRINITY_DN50285_c0_g1_i1.p1  | GH5_22  | 6.931    | 0        | 0        |
| TRINITY_DN95997_c3_g2_i1.p1  | GH5_22  | 6.421    | 0        | 0        |
| TRINITY_DN111015_c0_g1_i1.p1 | GH5_22  | 2.053    | 0        | 0        |
| TRINITY_DN87224_c0_g1_i3.p1  | GH5_4   | 47.271   | 54.319   | 16.771   |
| TRINITY_DN91269_c0_g2_i6.p1  | GH63    | 6.84     | 0.01     | 0        |
| TRINITY_DN91967_c1_g1_i1.p1  | GH63    | 1.906    | 0        | 0        |
| TRINITY_DN91967_c1_g6_i1.p2  | GH63    | 1.531    | 0        | 0        |
| TRINITY_DN91967_c1_g8_i2.p1  | GH63    | 0.726    | 0        | 0        |
| TRINITY_DN72223_c0_g1_i1.p1  | GH63    | 2.598    | 0        | 0        |
| TRINITY_DN90454_c0_g1_i1.p1  | GH67    | 9.166    | 0.098    | 6.391    |
| TRINITY_DN84976_c0_g1_i3.p1  | GH67    | 1.554    | 0        | 0        |
| TRINITY_DN95380_c2_g4_i1.p1  | GH67    | 0        | 0.891    | 0        |
| TRINITY_DN91457_c0_g1_i1.p1  | GH67    | 83.22    | 142.755  | 52.355   |
| TRINITY_DN94452_c0_g2_i3.p1  | GH7     | 32.932   | 128.184  | 32.038   |
| TRINITY_DN94399_c1_g1_i4.p1  | GH7     | 403.827  | 715.068  | 77.858   |
| TRINITY_DN94399_c1_g1_i5.p1  | GH7     | 1003.827 | 2171.869 | 1053.651 |
| TRINITY_DN94399_c1_g1_i6.p1  | GH7     | 384.678  | 490.448  | 167.544  |
| TRINITY_DN94399_c1_g3_i1.p1  | GH7     | 0        | 0.333    | 0.558    |
| TRINITY_DN94452_c0_g1_i7.p1  | GH7     | 37.118   | 24.403   | 47.926   |
| TRINITY_DN94452_c0_g1_i5.p1  | GH7     | 16.415   | 55.798   | 41.643   |
| TRINITY_DN94399_c1_g1_i3.p1  | GH7     | 246.314  | 226.256  | 65.633   |
| TRINITY_DN92290_c1_g3_i2.p1  | GH7     | 8.054    | 7.961    | 5.329    |
| TRINITY_DN94452_c0_g6_i1.p1  | GH7     | 200.586  | 380.635  | 284.867  |
| TRINITY_DN94452_c0_g1_i1.p1  | GH7     | 69.46    | 176.637  | 68.289   |
| TRINITY_DN93555_c0_g5_i12.p2 | GH7     | 0.374    | 0        | 1.503    |
| TRINITY_DN94399_c1_g1_i7.p1  | GH7     | 12.694   | 390.848  | 103.225  |
| TRINITY_DN94452_c0_g4_i1.p2  | GH7     | 17.447   | 173.229  | 39.645   |
| TRINITY_DN90397_c2_g1_i1.p1  | GH7     | 37.027   | 72.014   | 36.368   |
| TRINITY_DN90397_c2_g3_i1.p1  | GH7     | 22.597   | 61.233   | 28.275   |
| TRINITY_DN92290_c1_g1_i6.p1  | GH7     | 82.143   | 124.6    | 95.925   |
| TRINITY_DN94452_c0_g7_i1.p1  | GH7     | 0.51     | 0.274    | 1.386    |
| TRINITY_DN94452_c0_g1_i2.p1  | GH7     | 45.399   | 76.499   | 61.105   |
| TRINITY_DN94191_c0_g1_i1.p1  | GH73    | 0        | 0.225    | 0.369    |
| TRINITY_DN85865_c0_g1_i1.p1  | GH73    | 9.801    | 0        | 0        |



|                              |        |         |         |        |
|------------------------------|--------|---------|---------|--------|
| TRINITY_DN95540_c0_g1_i1.p1  | GH77   | 0.488   | 0       | 0      |
| TRINITY_DN85237_c0_g1_i2.p1  | GH77   | 3.766   | 0       | 0      |
| TRINITY_DN78869_c0_g1_i1.p1  | GH77   | 10.437  | 0       | 0      |
| TRINITY_DN40265_c0_g1_i1.p1  | GH77   | 0       | 0       | 1.692  |
| TRINITY_DN73110_c0_g1_i1.p1  | GH77   | 0       | 0       | 1.179  |
| TRINITY_DN95540_c1_g2_i1.p2  | GH77   | 3.653   | 0       | 0      |
| TRINITY_DN95540_c1_g3_i1.p1  | GH77   | 5.15    | 0       | 0      |
| TRINITY_DN95540_c1_g5_i1.p1  | GH77   | 1.134   | 0       | 0      |
| TRINITY_DN75832_c0_g1_i1.p1  | GH77   | 4.367   | 0       | 0      |
| TRINITY_DN65654_c0_g1_i1.p1  | GH77   | 1.112   | 0       | 0      |
| TRINITY_DN38365_c0_g1_i1.p1  | GH77   | 0       | 0       | 0.999  |
| TRINITY_DN75371_c0_g1_i1.p1  | GH77   | 0       | 0.999   | 0      |
| TRINITY_DN68936_c0_g1_i1.p1  | GH77   | 6.103   | 0       | 0      |
| TRINITY_DN85082_c0_g2_i2.p1  | GH77   | 2.859   | 0       | 0      |
| TRINITY_DN93102_c3_g1_i1.p1  | GH77   | 7.646   | 0.078   | 0      |
| TRINITY_DN32680_c0_g1_i1.p1  | GH77   | 4.413   | 0       | 0      |
| TRINITY_DN145669_c0_g1_i1.p1 | GH77   | 1.225   | 0       | 0      |
| TRINITY_DN112596_c0_g1_i1.p1 | GH77   | 0.908   | 0       | 0      |
| TRINITY_DN69459_c0_g1_i1.p1  | GH78   | 0       | 0.47    | 0      |
| TRINITY_DN168881_c0_g1_i1.p1 | GH78   | 0.953   | 0       | 0      |
| TRINITY_DN95272_c2_g1_i1.p1  | GH78   | 17.254  | 0.02    | 0.009  |
| TRINITY_DN44424_c0_g1_i1.p1  | GH78   | 0.794   | 0       | 0      |
| TRINITY_DN66353_c0_g2_i1.p1  | GH8    | 1.168   | 0       | 0      |
| TRINITY_DN47610_c0_g2_i1.p1  | GH8    | 1.35    | 0       | 0      |
| TRINITY_DN90984_c0_g1_i3.p2  | GH87   | 144.251 | 124.228 | 32.317 |
| TRINITY_DN80522_c0_g1_i2.p1  | GH88   | 0       | 0.059   | 0      |
| TRINITY_DN7989_c0_g1_i1.p2   | GH88   | 2.7     | 0       | 0      |
| TRINITY_DN93884_c4_g1_i1.p1  | GH88   | 2.144   | 0       | 0      |
| TRINITY_DN80522_c0_g1_i1.p1  | GH88   | 1.6     | 0.02    | 0      |
| TRINITY_DN67134_c0_g1_i1.p1  | GH88   | 1.146   | 0       | 0      |
| TRINITY_DN131842_c0_g1_i1.p1 | GH88   | 3.982   | 0       | 0      |
| TRINITY_DN131514_c0_g1_i1.p1 | GH92   | 0       | 0.881   | 0      |
| TRINITY_DN81929_c0_g1_i1.p1  | GH92   | 32.24   | 64.846  | 11.054 |
| TRINITY_DN82555_c0_g1_i1.p1  | GH92   | 1.645   | 11.369  | 14.619 |
| TRINITY_DN70138_c0_g2_i1.p1  | GH94   | 0.737   | 0       | 0      |
| TRINITY_DN74933_c0_g1_i1.p1  | GH94   | 0.25    | 1.41    | 0      |
| TRINITY_DN20342_c0_g1_i1.p1  | GH94   | 1.792   | 0       | 0      |
| TRINITY_DN83501_c0_g1_i1.p1  | GH95   | 0       | 5.494   | 0.009  |
| TRINITY_DN94272_c0_g2_i3.p1  | GH95   | 3.244   | 0.529   | 0.513  |
| TRINITY_DN89270_c0_g1_i1.p1  | GH95   | 0.238   | 5.748   | 7.49   |
| TRINITY_DN32640_c0_g1_i1.p2  | GH95   | 2.87    | 0       | 0      |
| TRINITY_DN94426_c0_g1_i1.p1  | GH97   | 0       | 2.233   | 0      |
| TRINITY_DN85404_c0_g1_i1.p1  | GH97   | 6.092   | 0.02    | 0      |
| TRINITY_DN80762_c0_g1_i1.p1  | GH99   | 12.524  | 0.901   | 5.32   |
| TRINITY_DN82198_c0_g1_i1.p1  | GH99   | 2.893   | 9.9     | 1.278  |
| TRINITY_DN133241_c0_g1_i1.p1 | PL10_1 | 1.724   | 0       | 0      |
| TRINITY_DN94825_c0_g1_i4.p1  | PL12   | 7.646   | 0.509   | 0.036  |
| TRINITY_DN113488_c0_g1_i1.p1 | PL1_2  | 0.987   | 0       | 0      |
| TRINITY_DN61793_c0_g1_i1.p1  | PL22   | 0.817   | 0       | 0      |
| TRINITY_DN102652_c0_g1_i1.p1 | PL33_1 | 0       | 0.793   | 0.432  |
| TRINITY_DN75797_c0_g3_i1.p2  | PL8_3  | 1.758   | 0       | 0      |
| TRINITY_DN75797_c0_g1_i1.p1  | PL8_3  | 0.023   | 1.273   | 0      |

|                              |       |       |   |   |
|------------------------------|-------|-------|---|---|
| TRINITY_DN111022_c0_g1_i1.p1 | PL9   | 1.554 | 0 | 0 |
| TRINITY_DN99725_c0_g1_i1.p1  | PL9_1 | 1.282 | 0 | 0 |

***c Holomastigotoides minor***

| Protein ID*                  | GH/PL family | TMM       |           |           |
|------------------------------|--------------|-----------|-----------|-----------|
|                              |              | Library 1 | Library 2 | Library 3 |
| TRINITY_DN66781_c0_g1_i1.p1  | GH1          | 0         | 0         | 8.269     |
| TRINITY_DN94619_c0_g1_i1.p1  | GH1          | 0         | 0.803     | 0         |
| TRINITY_DN60764_c0_g1_i1.p1  | GH1          | 11.808    | 3.07      | 63.645    |
| TRINITY_DN66518_c1_g1_i12.p1 | GH1          | 0         | 0.009     | 4.257     |
| TRINITY_DN69071_c1_g5_i1.p1  | GH1          | 0         | 0         | 4.871     |
| TRINITY_DN24065_c0_g1_i1.p1  | GH10         | 0         | 0         | 1.197     |
| TRINITY_DN61087_c0_g2_i1.p1  | GH10         | 0         | 0         | 4.738     |
| TRINITY_DN66431_c0_g1_i1.p1  | GH103        | 3.301     | 0.265     | 0.102     |
| TRINITY_DN73663_c0_g1_i1.p1  | GH105        | 0         | 0         | 1.279     |
| TRINITY_DN79525_c0_g1_i1.p2  | GH105        | 0         | 0.397     | 0         |
| TRINITY_DN47499_c0_g1_i1.p1  | GH105        | 0         | 18.102    | 0         |
| TRINITY_DN64359_c0_g1_i2.p1  | GH105        | 1.972     | 0         | 0         |
| TRINITY_DN64220_c5_g5_i1.p2  | GH105        | 0         | 5.328     | 0         |
| TRINITY_DN68855_c0_g1_i2.p1  | GH105        | 1.041     | 0         | 0.266     |
| TRINITY_DN64359_c0_g1_i1.p2  | GH105        | 7.731     | 17.255    | 0         |
| TRINITY_DN64147_c0_g1_i2.p2  | GH109        | 0         | 0         | 0.993     |
| TRINITY_DN55787_c0_g1_i1.p1  | GH109        | 0         | 0.026     | 1.054     |
| TRINITY_DN64147_c0_g1_i1.p1  | GH109        | 0         | 0         | 1.525     |
| TRINITY_DN67787_c0_g2_i2.p1  | GH11         | 488.364   | 139.605   | 165.001   |
| TRINITY_DN67787_c0_g3_i1.p2  | GH11         | 5.018     | 3.379     | 4.145     |
| TRINITY_DN61150_c3_g1_i1.p1  | GH11         | 0         | 0.388     | 0         |
| TRINITY_DN61150_c3_g1_i8.p1  | GH11         | 0         | 1.632     | 0.737     |
| TRINITY_DN61150_c3_g1_i6.p1  | GH11         | 0         | 0.406     | 0.481     |
| TRINITY_DN61150_c3_g1_i3.p1  | GH11         | 0         | 0.856     | 0.102     |
| TRINITY_DN61150_c3_g1_i2.p1  | GH11         | 0         | 0.565     | 0.072     |
| TRINITY_DN61150_c3_g1_i13.p1 | GH11         | 0         | 0.856     | 0.297     |
| TRINITY_DN61150_c3_g1_i4.p1  | GH11         | 0         | 0.344     | 0.215     |
| TRINITY_DN61150_c3_g1_i5.p1  | GH11         | 0         | 0.273     | 0.102     |
| TRINITY_DN71334_c0_g1_i1.p1  | GH11         | 0         | 0.45      | 0.164     |
| TRINITY_DN50589_c0_g2_i1.p1  | GH115        | 0.033     | 0.644     | 0         |
| TRINITY_DN35255_c0_g1_i1.p1  | GH115        | 0         | 0         | 0.798     |
| TRINITY_DN69545_c0_g1_i2.p1  | GH116        | 0         | 0         | 2.589     |
| TRINITY_DN65622_c0_g2_i1.p1  | GH127        | 0         | 0         | 8.422     |
| TRINITY_DN48875_c0_g1_i2.p1  | GH13         | 0         | 0         | 3.162     |
| TRINITY_DN48875_c0_g1_i1.p1  | GH13         | 0         | 3.529     | 0         |
| TRINITY_DN49267_c0_g4_i1.p1  | GH13         | 0         | 0         | 1.31      |
| TRINITY_DN48203_c0_g1_i1.p1  | GH13         | 0         | 0         | 1.075     |
| TRINITY_DN66056_c0_g2_i1.p1  | GH13         | 0         | 0         | 1.781     |
| TRINITY_DN40245_c0_g1_i1.p1  | GH13         | 0         | 13.4      | 0         |
| TRINITY_DN51957_c0_g1_i1.p1  | GH133        | 0         | 1.641     | 0.123     |
| TRINITY_DN64162_c1_g1_i1.p1  | GH133        | 12.029    | 5.478     | 5.577     |
| TRINITY_DN64162_c0_g2_i1.p2  | GH133        | 1.617     | 0         | 0         |
| TRINITY_DN74071_c0_g1_i1.p2  | GH135        | 0         | 0         | 2.026     |
| TRINITY_DN35363_c0_g2_i1.p1  | GH13_1       | 0         | 0.741     | 0         |
| TRINITY_DN2933_c0_g1_i1.p1   | GH13_14      | 0         | 0         | 0.716     |
| TRINITY_DN66056_c0_g3_i1.p1  | GH13_14      | 0         | 0         | 1.32      |
| TRINITY_DN49912_c0_g1_i1.p1  | GH13_14      | 0         | 29.597    | 0         |

|                              |         |        |        |        |
|------------------------------|---------|--------|--------|--------|
| TRINITY_DN41667_c0_g1_i1.p1  | GH13_16 | 0      | 0      | 1.873  |
| TRINITY_DN68060_c1_g3_i1.p1  | GH13_20 | 0      | 0      | 1.515  |
| TRINITY_DN46419_c0_g1_i1.p2  | GH13_23 | 0      | 0.088  | 0      |
| TRINITY_DN64162_c1_g1_i1.p1  | GH13_25 | 12.029 | 5.478  | 5.577  |
| TRINITY_DN51957_c0_g1_i1.p1  | GH13_25 | 0      | 1.641  | 0.123  |
| TRINITY_DN64162_c0_g2_i1.p2  | GH13_25 | 1.617  | 0      | 0      |
| TRINITY_DN94677_c0_g1_i1.p2  | GH13_3  | 0      | 0.238  | 0.194  |
| TRINITY_DN58380_c0_g2_i2.p1  | GH13_31 | 0      | 0      | 2.589  |
| TRINITY_DN63141_c0_g3_i2.p1  | GH13_36 | 0      | 0.009  | 3.039  |
| TRINITY_DN63328_c0_g1_i1.p1  | GH13_8  | 9.249  | 0.609  | 0.798  |
| TRINITY_DN63328_c0_g1_i2.p1  | GH13_8  | 8.307  | 13.4   | 0.942  |
| TRINITY_DN42365_c0_g4_i1.p1  | GH144   | 0      | 0.053  | 0.624  |
| TRINITY_DN63559_c0_g1_i1.p1  | GH154   | 19.672 | 31.758 | 7.645  |
| TRINITY_DN63559_c0_g1_i3.p1  | GH154   | 26.362 | 34.731 | 4.042  |
| TRINITY_DN68962_c1_g2_i1.p2  | GH16    | 0      | 0      | 2.333  |
| TRINITY_DN83614_c0_g1_i1.p1  | GH17    | 0      | 48.617 | 0      |
| TRINITY_DN91581_c0_g1_i1.p1  | GH18    | 0      | 0.406  | 0.154  |
| TRINITY_DN87065_c0_g1_i1.p1  | GH18    | 0      | 0      | 0.768  |
| TRINITY_DN53262_c0_g1_i1.p1  | GH18    | 5.45   | 0      | 0      |
| TRINITY_DN59285_c0_g1_i1.p1  | GH18    | 0      | 0.009  | 2.876  |
| TRINITY_DN59580_c0_g2_i1.p1  | GH18    | 0      | 0      | 1.944  |
| TRINITY_DN50902_c0_g1_i1.p1  | GH18    | 0      | 8.584  | 0      |
| TRINITY_DN65720_c0_g1_i7.p1  | GH18    | 0      | 0.635  | 0.287  |
| TRINITY_DN68825_c1_g6_i2.p1  | GH18    | 0      | 0      | 0      |
| TRINITY_DN65720_c0_g1_i5.p1  | GH18    | 0      | 0.529  | 0.481  |
| TRINITY_DN55442_c0_g1_i4.p1  | GH18    | 0      | 0.635  | 0.594  |
| TRINITY_DN55442_c0_g1_i1.p1  | GH18    | 0.078  | 0.829  | 1.474  |
| TRINITY_DN64980_c0_g1_i1.p1  | GH18    | 0      | 0.494  | 0.42   |
| TRINITY_DN65720_c0_g1_i1.p1  | GH18    | 0      | 0.459  | 0.553  |
| TRINITY_DN64980_c1_g1_i2.p1  | GH18    | 64.798 | 128.56 | 95.503 |
| TRINITY_DN50745_c0_g1_i1.p1  | GH18    | 0      | 0      | 2.006  |
| TRINITY_DN8414_c0_g1_i1.p1   | GH19    | 0      | 0.185  | 0.604  |
| TRINITY_DN64151_c0_g2_i1.p1  | GH2     | 0      | 0.018  | 1.126  |
| TRINITY_DN68819_c0_g12_i1.p1 | GH2     | 0      | 0      | 2.896  |
| TRINITY_DN63552_c0_g2_i3.p1  | GH2     | 0      | 0      | 2.026  |
| TRINITY_DN31754_c0_g2_i1.p1  | GH2     | 0      | 0.273  | 0      |
| TRINITY_DN49451_c0_g2_i1.p1  | GH2     | 0      | 0.053  | 1.443  |
| TRINITY_DN63552_c0_g2_i6.p1  | GH2     | 0      | 0      | 1.269  |
| TRINITY_DN63552_c0_g1_i2.p1  | GH2     | 0      | 0      | 1.545  |
| TRINITY_DN63552_c0_g2_i4.p1  | GH2     | 0      | 0      | 0.829  |
| TRINITY_DN69298_c2_g7_i1.p1  | GH2     | 0      | 0      | 1.535  |
| TRINITY_DN48211_c0_g1_i1.p1  | GH20    | 0.066  | 0.573  | 1.515  |
| TRINITY_DN48211_c0_g1_i2.p1  | GH20    | 0      | 0.124  | 0.594  |
| TRINITY_DN75635_c0_g1_i1.p1  | GH25    | 0      | 0.556  | 0.88   |
| TRINITY_DN21662_c0_g1_i1.p1  | GH25    | 0      | 0      | 0.696  |
| TRINITY_DN61438_c0_g1_i1.p1  | GH26    | 0      | 0.847  | 0.051  |
| TRINITY_DN40911_c0_g1_i1.p1  | GH26    | 0      | 0.785  | 0      |
| TRINITY_DN40911_c0_g1_i2.p1  | GH26    | 0      | 0.176  | 0      |
| TRINITY_DN12389_c0_g1_i1.p1  | GH26    | 0      | 0.097  | 0.307  |
| TRINITY_DN53852_c0_g1_i1.p1  | GH26    | 0      | 1.447  | 0.113  |
| TRINITY_DN20328_c0_g1_i1.p1  | GH26    | 0      | 0.362  | 0      |
| TRINITY_DN46303_c0_g1_i1.p1  | GH27    | 0      | 44.77  | 0      |

|                              |        |        |        |         |
|------------------------------|--------|--------|--------|---------|
| TRINITY_DN56866_c0_g1_i1.p1  | GH27   | 0      | 0.326  | 0.194   |
| TRINITY_DN56866_c0_g1_i2.p1  | GH27   | 0      | 0.335  | 0.901   |
| TRINITY_DN69298_c1_g1_i1.p1  | GH29   | 0.022  | 0      | 2.661   |
| TRINITY_DN86098_c0_g1_i1.p2  | GH29   | 0      | 0      | 0.972   |
| TRINITY_DN69501_c2_g6_i1.p1  | GH3    | 0      | 0      | 2.139   |
| TRINITY_DN94400_c0_g1_i1.p1  | GH3    | 0      | 0.362  | 0.798   |
| TRINITY_DN40929_c0_g2_i1.p2  | GH3    | 0      | 0      | 1.781   |
| TRINITY_DN64557_c0_g2_i2.p1  | GH3    | 0      | 0.026  | 2.323   |
| TRINITY_DN60065_c0_g2_i2.p1  | GH3    | 0      | 9.219  | 1.658   |
| TRINITY_DN68267_c0_g2_i2.p1  | GH3    | 27.725 | 1.5    | 4.523   |
| TRINITY_DN53522_c0_g1_i1.p1  | GH3    | 10.689 | 28.75  | 36.218  |
| TRINITY_DN53417_c0_g1_i2.p1  | GH3    | 0      | 0.203  | 0.829   |
| TRINITY_DN65065_c0_g1_i16.p1 | GH3    | 45.901 | 22.963 | 70.143  |
| TRINITY_DN68267_c0_g1_i3.p1  | GH3    | 31.989 | 3.299  | 41.672  |
| TRINITY_DN68267_c0_g1_i7.p1  | GH3    | 6.402  | 0.053  | 7.491   |
| TRINITY_DN25478_c0_g1_i1.p1  | GH3    | 0      | 0      | 2.19    |
| TRINITY_DN63821_c0_g1_i1.p1  | GH3    | 0.111  | 0      | 2.354   |
| TRINITY_DN63948_c6_g6_i1.p1  | GH3    | 0      | 0.009  | 1.596   |
| TRINITY_DN59619_c0_g1_i1.p1  | GH3    | 0      | 1.041  | 0       |
| TRINITY_DN64557_c0_g2_i4.p1  | GH3    | 0      | 0.053  | 2.712   |
| TRINITY_DN35777_c0_g1_i1.p1  | GH3    | 0      | 0.468  | 1.054   |
| TRINITY_DN69317_c0_g1_i3.p1  | GH3    | 0      | 0      | 10.694  |
| TRINITY_DN69317_c0_g1_i5.p1  | GH3    | 0      | 0      | 0.348   |
| TRINITY_DN38140_c0_g1_i1.p1  | GH3    | 0      | 0.459  | 0.307   |
| TRINITY_DN69377_c1_g1_i7.p1  | GH3    | 1.13   | 0.318  | 8.494   |
| TRINITY_DN49036_c0_g1_i1.p1  | GH3    | 0      | 0      | 1.77    |
| TRINITY_DN65065_c0_g1_i14.p1 | GH3    | 16.138 | 3.52   | 17.029  |
| TRINITY_DN68267_c0_g4_i1.p1  | GH3    | 15.042 | 0      | 0.553   |
| TRINITY_DN73300_c0_g1_i1.p1  | GH3    | 2.426  | 0      | 0       |
| TRINITY_DN73498_c0_g1_i1.p1  | GH3    | 0      | 0      | 0.44    |
| TRINITY_DN69317_c0_g6_i1.p2  | GH3    | 0.41   | 0.026  | 20.683  |
| TRINITY_DN68887_c0_g3_i6.p1  | GH3    | 0      | 0      | 6.98    |
| TRINITY_DN68267_c0_g1_i2.p1  | GH3    | 4.143  | 0.079  | 8.238   |
| TRINITY_DN38952_c0_g1_i1.p1  | GH3    | 0      | 0      | 1.044   |
| TRINITY_DN53282_c0_g1_i1.p1  | GH3    | 1.462  | 0      | 0       |
| TRINITY_DN69377_c1_g2_i1.p2  | GH3    | 4.054  | 0.847  | 16.241  |
| TRINITY_DN43941_c0_g1_i1.p3  | GH3    | 0      | 0.582  | 0       |
| TRINITY_DN60063_c0_g1_i1.p1  | GH3    | 6.369  | 0.035  | 0       |
| TRINITY_DN47038_c0_g1_i1.p1  | GH3    | 0      | 0.45   | 0       |
| TRINITY_DN60065_c0_g1_i1.p1  | GH3    | 8.75   | 0.503  | 4.974   |
| TRINITY_DN65065_c0_g1_i10.p1 | GH3    | 32.809 | 13.1   | 100.169 |
| TRINITY_DN69377_c1_g1_i2.p1  | GH3    | 28.456 | 0.494  | 29.76   |
| TRINITY_DN69377_c1_g1_i1.p2  | GH3    | 16.05  | 21.031 | 141.555 |
| TRINITY_DN69377_c1_g1_i12.p1 | GH3    | 8.363  | 1.173  | 14.031  |
| TRINITY_DN60063_c0_g1_i3.p1  | GH3    | 4.12   | 8.654  | 2.599   |
| TRINITY_DN52704_c0_g2_i1.p1  | GH3    | 0      | 0      | 1.32    |
| TRINITY_DN45251_c1_g1_i1.p1  | GH3    | 0      | 0.079  | 0.89    |
| TRINITY_DN77311_c0_g1_i1.p1  | GH3    | 0      | 0      | 1.095   |
| TRINITY_DN65065_c0_g1_i11.p1 | GH3    | 24.889 | 0.062  | 37.354  |
| TRINITY_DN45509_c0_g3_i1.p1  | GH30   | 0      | 0      | 1.023   |
| TRINITY_DN25652_c0_g2_i1.p1  | GH30_1 | 0.066  | 0.273  | 0.604   |
| TRINITY_DN56471_c0_g2_i1.p1  | GH30_1 | 0      | 0.573  | 1.115   |

|                              |         |        |         |         |
|------------------------------|---------|--------|---------|---------|
| TRINITY_DN56471_c0_g1_i1.p1  | GH30_1  | 0      | 0.273   | 0.501   |
| TRINITY_DN64559_c0_g1_i2.p1  | GH30_1  | 22.064 | 62.458  | 128.763 |
| TRINITY_DN64559_c0_g1_i3.p1  | GH30_1  | 40.008 | 106.752 | 361.553 |
| TRINITY_DN65609_c0_g1_i3.p1  | GH30_1  | 4.32   | 93.696  | 257.096 |
| TRINITY_DN42541_c0_g1_i1.p1  | GH30_4  | 0      | 0.035   | 1.177   |
| TRINITY_DN68130_c0_g2_i2.p1  | GH31    | 0      | 0       | 1.402   |
| TRINITY_DN70708_c0_g1_i1.p1  | GH31    | 0      | 0.185   | 0.757   |
| TRINITY_DN60802_c0_g1_i2.p1  | GH31    | 18.365 | 25.239  | 0.113   |
| TRINITY_DN68276_c0_g6_i1.p1  | GH31    | 2.171  | 0       | 0       |
| TRINITY_DN64361_c0_g1_i1.p1  | GH31    | 6.092  | 0.873   | 7.819   |
| TRINITY_DN44862_c0_g1_i1.p1  | GH31    | 5.693  | 0       | 0       |
| TRINITY_DN58399_c0_g1_i1.p1  | GH31    | 21.821 | 5.011   | 17.51   |
| TRINITY_DN28055_c0_g1_i1.p1  | GH31    | 0      | 0       | 1.341   |
| TRINITY_DN62368_c0_g1_i1.p1  | GH31    | 17.501 | 2.435   | 18.186  |
| TRINITY_DN61355_c0_g1_i1.p1  | GH31    | 10.478 | 0.803   | 23.026  |
| TRINITY_DN63443_c0_g1_i1.p1  | GH31    | 5.239  | 24.489  | 33.905  |
| TRINITY_DN5654_c0_g1_i1.p1   | GH31    | 0      | 0.626   | 0       |
| TRINITY_DN61619_c0_g2_i1.p1  | GH33    | 0      | 0       | 0.911   |
| TRINITY_DN61619_c1_g1_i2.p1  | GH33    | 0      | 0       | 2.497   |
| TRINITY_DN67738_c0_g4_i1.p2  | GH33    | 0      | 0       | 0.716   |
| TRINITY_DN67738_c0_g4_i3.p1  | GH33    | 0      | 0       | 0.266   |
| TRINITY_DN67738_c4_g1_i1.p2  | GH33    | 0      | 0       | 1.607   |
| TRINITY_DN57387_c0_g1_i1.p1  | GH33    | 0      | 0       | 2.118   |
| TRINITY_DN68937_c0_g1_i1.p1  | GH33    | 0      | 0       | 1.955   |
| TRINITY_DN61619_c0_g2_i2.p1  | GH33    | 0      | 0.044   | 0.655   |
| TRINITY_DN69211_c0_g1_i7.p1  | GH33    | 0.055  | 0.009   | 6.908   |
| TRINITY_DN5698_c0_g1_i1.p2   | GH33    | 0      | 0       | 0.942   |
| TRINITY_DN23385_c0_g2_i1.p1  | GH35    | 0      | 0.018   | 0.665   |
| TRINITY_DN23385_c0_g1_i1.p2  | GH35    | 0      | 0       | 1.136   |
| TRINITY_DN22693_c0_g1_i1.p1  | GH35    | 0      | 0       | 1.064   |
| TRINITY_DN22693_c0_g1_i2.p2  | GH35    | 0      | 0       | 0.358   |
| TRINITY_DN59849_c0_g1_i1.p1  | GH35    | 0.022  | 0.565   | 1.146   |
| TRINITY_DN69574_c2_g1_i14.p1 | GH35    | 0.753  | 0.723   | 2.354   |
| TRINITY_DN69574_c2_g1_i11.p1 | GH35    | 1.65   | 0       | 0       |
| TRINITY_DN69574_c2_g1_i10.p1 | GH35    | 2.249  | 1.535   | 1.259   |
| TRINITY_DN68796_c1_g1_i4.p1  | GH35    | 62.892 | 37.334  | 61.68   |
| TRINITY_DN68796_c1_g1_i1.p1  | GH35    | 89.598 | 55.383  | 62.396  |
| TRINITY_DN69574_c2_g1_i2.p1  | GH35    | 77.436 | 21.313  | 68.526  |
| TRINITY_DN62488_c0_g1_i1.p1  | GH36    | 0.022  | 0       | 3.346   |
| TRINITY_DN69465_c0_g2_i1.p1  | GH38    | 0      | 0       | 5.322   |
| TRINITY_DN83200_c0_g1_i1.p1  | GH38    | 0      | 0       | 0.839   |
| TRINITY_DN53591_c0_g2_i1.p1  | GH39    | 0      | 0.759   | 0       |
| TRINITY_DN61259_c0_g1_i1.p1  | GH39    | 0      | 0       | 6.785   |
| TRINITY_DN67812_c0_g1_i6.p1  | GH4     | 0.022  | 0       | 0.737   |
| TRINITY_DN62350_c0_g2_i1.p1  | GH4     | 0.011  | 0       | 5.69    |
| TRINITY_DN67812_c0_g1_i1.p1  | GH4     | 0.022  | 0       | 1.904   |
| TRINITY_DN27013_c0_g2_i1.p1  | GH4     | 0      | 0       | 1.064   |
| TRINITY_DN80850_c0_g1_i1.p1  | GH42    | 0      | 0       | 1.341   |
| TRINITY_DN67960_c0_g1_i1.p1  | GH42    | 0      | 0.053   | 8.586   |
| TRINITY_DN22885_c0_g2_i1.p1  | GH43_17 | 0      | 0       | 0.88    |
| TRINITY_DN22885_c0_g1_i1.p2  | GH43_17 | 0      | 0       | 0.389   |
| TRINITY_DN35769_c0_g1_i1.p1  | GH43_17 | 1.839  | 0       | 0.113   |

|                              |         |         |         |         |
|------------------------------|---------|---------|---------|---------|
| TRINITY_DN22446_c0_g1_i1.p1  | GH43_19 | 0       | 0.026   | 0.952   |
| TRINITY_DN48044_c0_g1_i1.p2  | GH43_19 | 0       | 0       | 0.624   |
| TRINITY_DN62208_c0_g2_i1.p1  | GH43_19 | 0       | 0       | 4.718   |
| TRINITY_DN48044_c0_g2_i1.p1  | GH43_19 | 0       | 0       | 1.085   |
| TRINITY_DN74283_c0_g1_i1.p1  | GH43_19 | 0.089   | 0.662   | 0.092   |
| TRINITY_DN69200_c0_g1_i2.p1  | GH43_28 | 13.657  | 19.496  | 61.434  |
| TRINITY_DN3415_c0_g1_i1.p1   | GH43_4  | 0       | 0       | 1.31    |
| TRINITY_DN62382_c0_g3_i1.p1  | GH45    | 0       | 0.82    | 0.256   |
| TRINITY_DN62382_c0_g2_i1.p1  | GH45    | 0       | 0.291   | 0       |
| TRINITY_DN68045_c0_g1_i2.p1  | GH45    | 17.379  | 0.662   | 4.442   |
| TRINITY_DN64335_c1_g1_i2.p1  | GH47    | 20.658  | 0.873   | 13.611  |
| TRINITY_DN63379_c0_g1_i2.p1  | GH47    | 4.276   | 2.955   | 15.361  |
| TRINITY_DN63004_c0_g1_i1.p1  | GH47    | 11.619  | 0.009   | 12.936  |
| TRINITY_DN64335_c0_g1_i1.p1  | GH47    | 7.111   | 0       | 0       |
| TRINITY_DN63212_c0_g1_i2.p1  | GH47    | 9.493   | 0       | 6.98    |
| TRINITY_DN65073_c0_g1_i1.p1  | GH47    | 3.168   | 0       | 13.11   |
| TRINITY_DN59440_c0_g1_i4.p1  | GH50    | 0       | 0.018   | 4.247   |
| TRINITY_DN67737_c0_g6_i3.p1  | GH50    | 0       | 0.018   | 40.424  |
| TRINITY_DN66213_c0_g1_i2.p1  | GH51    | 0.775   | 0       | 8.32    |
| TRINITY_DN15092_c0_g1_i1.p1  | GH51    | 0       | 0       | 0.921   |
| TRINITY_DN83701_c0_g1_i1.p1  | GH51    | 0       | 0       | 1.044   |
| TRINITY_DN66213_c0_g1_i3.p1  | GH51    | 0       | 0       | 0.307   |
| TRINITY_DN21226_c0_g1_i1.p1  | GH51    | 0       | 0       | 1.412   |
| TRINITY_DN69031_c2_g20_i1.p2 | GH51    | 0       | 0.891   | 0.02    |
| TRINITY_DN27133_c0_g1_i1.p1  | GH51    | 0       | 0.009   | 1.689   |
| TRINITY_DN65188_c0_g6_i1.p1  | GH53    | 1.817   | 0.053   | 0       |
| TRINITY_DN65188_c0_g3_i1.p1  | GH53    | 14.555  | 8.125   | 0       |
| TRINITY_DN65188_c0_g1_i1.p1  | GH53    | 3.6     | 0       | 0.358   |
| TRINITY_DN55394_c0_g1_i1.p1  | GH53    | 0.111   | 0.776   | 0.675   |
| TRINITY_DN65188_c0_g2_i1.p1  | GH53    | 125.818 | 6.802   | 84.45   |
| TRINITY_DN65188_c0_g1_i3.p1  | GH53    | 0       | 0       | 0       |
| TRINITY_DN48319_c0_g2_i1.p1  | GH55    | 0       | 1.041   | 0       |
| TRINITY_DN31150_c0_g2_i1.p2  | GH57    | 0       | 0       | 1.156   |
| TRINITY_DN37628_c0_g1_i1.p1  | GH5_1   | 0       | 0.529   | 0       |
| TRINITY_DN44750_c0_g1_i1.p1  | GH5_1   | 0       | 1.756   | 0.716   |
| TRINITY_DN44363_c0_g1_i1.p1  | GH5_1   | 0       | 0.273   | 0.184   |
| TRINITY_DN20537_c0_g1_i1.p1  | GH5_1   | 0       | 1.447   | 0.44    |
| TRINITY_DN46766_c0_g1_i1.p1  | GH5_1   | 0       | 0.503   | 0       |
| TRINITY_DN16914_c0_g1_i1.p1  | GH5_1   | 0       | 0.494   | 0.113   |
| TRINITY_DN46766_c0_g2_i1.p1  | GH5_1   | 0       | 0.653   | 0.133   |
| TRINITY_DN93065_c0_g1_i1.p1  | GH5_1   | 0       | 0.565   | 0       |
| TRINITY_DN56858_c0_g1_i1.p1  | GH5_1   | 0       | 0.653   | 0.092   |
| TRINITY_DN95253_c0_g1_i1.p2  | GH5_1   | 0       | 0.282   | 0.461   |
| TRINITY_DN68051_c1_g1_i1.p1  | GH5_1   | 30.228  | 1.667   | 1.474   |
| TRINITY_DN68051_c2_g1_i1.p1  | GH5_1   | 71.798  | 16.285  | 35.153  |
| TRINITY_DN56858_c0_g1_i2.p1  | GH5_1   | 0       | 0.503   | 0.031   |
| TRINITY_DN68051_c2_g2_i1.p1  | GH5_1   | 282.296 | 124.996 | 138.925 |
| TRINITY_DN2664_c0_g1_i1.p1   | GH5_1   | 0       | 0.185   | 0.757   |
| TRINITY_DN68051_c2_g2_i2.p1  | GH5_1   | 7.155   | 1.023   | 4.401   |
| TRINITY_DN49433_c0_g1_i1.p1  | GH5_1   | 0       | 1.297   | 0.164   |
| TRINITY_DN79451_c0_g1_i1.p2  | GH5_12  | 0       | 0       | 1.31    |
| TRINITY_DN89269_c0_g1_i1.p1  | GH5_2   | 0       | 0.538   | 0.317   |

|                              |       |          |          |          |
|------------------------------|-------|----------|----------|----------|
| TRINITY_DN67184_c0_g1_i8.p1  | GH5_2 | 0        | 2.011    | 0.041    |
| TRINITY_DN67184_c0_g1_i3.p1  | GH5_2 | 0        | 0.653    | 0        |
| TRINITY_DN67184_c0_g1_i4.p1  | GH5_2 | 0        | 0.847    | 0        |
| TRINITY_DN67184_c0_g1_i1.p1  | GH5_2 | 0        | 0.582    | 0.276    |
| TRINITY_DN48307_c0_g1_i1.p1  | GH5_2 | 0        | 1.676    | 0.061    |
| TRINITY_DN67184_c0_g1_i7.p1  | GH5_2 | 0        | 0.644    | 0        |
| TRINITY_DN50613_c0_g1_i1.p1  | GH5_4 | 0        | 1.253    | 0        |
| TRINITY_DN43138_c0_g1_i1.p1  | GH5_4 | 0        | 0.159    | 1.289    |
| TRINITY_DN57379_c0_g2_i1.p1  | GH5_4 | 13.912   | 51.581   | 108.612  |
| TRINITY_DN48749_c0_g1_i1.p1  | GH62  | 0        | 0.468    | 0.061    |
| TRINITY_DN55964_c0_g1_i1.p2  | GH63  | 0        | 0        | 17.387   |
| TRINITY_DN61665_c0_g1_i1.p1  | GH67  | 57.709   | 17.494   | 48.089   |
| TRINITY_DN69569_c1_g2_i15.p1 | GH7   | 0        | 1.756    | 0.368    |
| TRINITY_DN69569_c1_g3_i2.p1  | GH7   | 0        | 0.706    | 0.287    |
| TRINITY_DN68216_c1_g2_i4.p1  | GH7   | 191.701  | 91.808   | 114.087  |
| TRINITY_DN68520_c0_g2_i1.p1  | GH7   | 0        | 0.697    | 0.041    |
| TRINITY_DN68216_c1_g2_i5.p1  | GH7   | 0.709    | 0.565    | 309.33   |
| TRINITY_DN68828_c0_g1_i3.p1  | GH7   | 41.216   | 0.282    | 0        |
| TRINITY_DN68216_c1_g1_i5.p1  | GH7   | 161.119  | 54.916   | 159.812  |
| TRINITY_DN68216_c1_g3_i1.p1  | GH7   | 6.391    | 0.053    | 0        |
| TRINITY_DN68940_c0_g2_i3.p1  | GH7   | 1281.166 | 567.672  | 1058.676 |
| TRINITY_DN68828_c0_g1_i2.p1  | GH7   | 6.69     | 0        | 0        |
| TRINITY_DN68216_c1_g2_i3.p1  | GH7   | 685.426  | 903.182  | 952.53   |
| TRINITY_DN68828_c0_g1_i4.p1  | GH7   | 118.43   | 227.875  | 283.049  |
| TRINITY_DN82688_c0_g1_i1.p1  | GH7   | 0        | 0.309    | 0.481    |
| TRINITY_DN10487_c0_g1_i1.p1  | GH7   | 0        | 0.812    | 0        |
| TRINITY_DN6781_c0_g1_i1.p1   | GH7   | 0        | 0.494    | 0.491    |
| TRINITY_DN64290_c1_g1_i1.p1  | GH7   | 0        | 1.844    | 0.215    |
| TRINITY_DN64120_c3_g2_i1.p1  | GH7   | 0        | 0.812    | 0.297    |
| TRINITY_DN64120_c3_g1_i8.p1  | GH7   | 0        | 0.441    | 0.297    |
| TRINITY_DN64120_c3_g1_i5.p1  | GH7   | 0        | 0.265    | 0.154    |
| TRINITY_DN60468_c0_g2_i1.p1  | GH7   | 58.362   | 48.97    | 53.963   |
| TRINITY_DN59254_c0_g5_i1.p1  | GH7   | 0.044    | 0.371    | 1.208    |
| TRINITY_DN59254_c0_g2_i1.p1  | GH7   | 0        | 1.129    | 0        |
| TRINITY_DN59254_c0_g1_i1.p1  | GH7   | 0        | 0.529    | 0.205    |
| TRINITY_DN68216_c0_g1_i1.p1  | GH7   | 0.044    | 0.291    | 0.461    |
| TRINITY_DN56183_c0_g1_i1.p1  | GH7   | 0        | 0.944    | 0.317    |
| TRINITY_DN56054_c2_g1_i1.p1  | GH7   | 0        | 0.52     | 0        |
| TRINITY_DN53777_c0_g3_i2.p1  | GH7   | 0        | 0.697    | 0.133    |
| TRINITY_DN53777_c0_g1_i1.p1  | GH7   | 0        | 0.873    | 0.379    |
| TRINITY_DN52750_c0_g1_i2.p1  | GH7   | 0        | 0.812    | 0.317    |
| TRINITY_DN52750_c0_g1_i1.p1  | GH7   | 0        | 0.238    | 0.174    |
| TRINITY_DN52420_c0_g2_i1.p1  | GH7   | 0        | 0.423    | 0.215    |
| TRINITY_DN52420_c0_g1_i1.p1  | GH7   | 0        | 0.573    | 0.338    |
| TRINITY_DN51792_c0_g2_i1.p1  | GH7   | 0        | 1.606    | 0.174    |
| TRINITY_DN50509_c0_g1_i1.p1  | GH7   | 0        | 0.812    | 0.133    |
| TRINITY_DN50100_c1_g1_i1.p1  | GH7   | 0        | 0.644    | 0.389    |
| TRINITY_DN48575_c0_g1_i1.p1  | GH7   | 0        | 1.561    | 0.297    |
| TRINITY_DN36829_c0_g1_i1.p1  | GH7   | 0        | 0.45     | 0.082    |
| TRINITY_DN33738_c0_g1_i1.p1  | GH7   | 0        | 0.212    | 0.092    |
| TRINITY_DN64290_c1_g2_i1.p1  | GH7   | 642.615  | 1265.695 | 1168.475 |
| TRINITY_DN64290_c1_g3_i1.p1  | GH7   | 0        | 0.573    | 0.123    |

|                             |        |         |         |         |
|-----------------------------|--------|---------|---------|---------|
| TRINITY_DN58360_c0_g1_i1.p1 | GH7    | 0       | 1.041   | 0.041   |
| TRINITY_DN64491_c1_g3_i1.p1 | GH7    | 183.992 | 104.564 | 231.961 |
| TRINITY_DN848_c0_g1_i1.p1   | GH7    | 0       | 0.344   | 0       |
| TRINITY_DN66902_c1_g2_i1.p1 | GH7    | 4.84    | 0       | 0.338   |
| TRINITY_DN31518_c0_g1_i1.p1 | GH7    | 0       | 0.688   | 0       |
| TRINITY_DN64491_c1_g1_i1.p1 | GH7    | 0       | 0.75    | 1.535   |
| TRINITY_DN65325_c1_g2_i7.p1 | GH7    | 0.066   | 0       | 6.56    |
| TRINITY_DN65325_c1_g2_i5.p1 | GH7    | 568.569 | 324.756 | 457.424 |
| TRINITY_DN65325_c1_g2_i4.p1 | GH7    | 50.863  | 11.998  | 26.936  |
| TRINITY_DN65325_c1_g2_i3.p2 | GH7    | 410.418 | 170.648 | 224.45  |
| TRINITY_DN65226_c0_g2_i2.p1 | GH7    | 62.228  | 151.637 | 91.071  |
| TRINITY_DN65226_c0_g1_i1.p2 | GH7    | 284.124 | 400.967 | 329.542 |
| TRINITY_DN65325_c1_g3_i1.p1 | GH7    | 1.972   | 0.088   | 0       |
| TRINITY_DN848_c0_g1_i2.p1   | GH7    | 0       | 0       | 0       |
| TRINITY_DN20914_c0_g1_i1.p1 | GH7    | 0       | 0       | 0.501   |
| TRINITY_DN65125_c1_g1_i2.p1 | GH7    | 0       | 1.835   | 0.389   |
| TRINITY_DN50100_c0_g1_i1.p1 | GH7    | 0       | 0.512   | 0       |
| TRINITY_DN68223_c0_g3_i1.p1 | GH73   | 0       | 0       | 0.655   |
| TRINITY_DN51470_c0_g1_i1.p1 | GH73   | 0       | 0       | 6.417   |
| TRINITY_DN65684_c4_g1_i1.p1 | GH77   | 0       | 0       | 0.931   |
| TRINITY_DN58764_c0_g1_i2.p1 | GH77   | 0       | 0       | 2.006   |
| TRINITY_DN65921_c0_g1_i1.p2 | GH77   | 0       | 0       | 2.149   |
| TRINITY_DN65684_c4_g4_i1.p1 | GH77   | 0       | 0       | 1.013   |
| TRINITY_DN49533_c0_g1_i1.p1 | GH78   | 0       | 0       | 1.136   |
| TRINITY_DN60339_c0_g1_i2.p1 | GH8    | 0       | 0.759   | 0       |
| TRINITY_DN69379_c1_g2_i3.p1 | GH87   | 0.055   | 0.856   | 1.412   |
| TRINITY_DN52851_c0_g1_i1.p1 | GH87   | 0.033   | 0.909   | 1.76    |
| TRINITY_DN19116_c0_g1_i1.p1 | GH88   | 0.078   | 0       | 0.972   |
| TRINITY_DN66630_c0_g1_i1.p2 | GH88   | 0       | 0       | 7.757   |
| TRINITY_DN69268_c0_g1_i4.p1 | GH9    | 64.144  | 42.847  | 71.883  |
| TRINITY_DN69268_c0_g1_i3.p1 | GH9    | 321.607 | 197.528 | 216.324 |
| TRINITY_DN53296_c0_g1_i1.p1 | GH9    | 0       | 1.685   | 0.154   |
| TRINITY_DN68916_c0_g3_i1.p2 | GH9    | 0.953   | 0       | 0       |
| TRINITY_DN62864_c0_g1_i4.p2 | GH92   | 0       | 0.459   | 0       |
| TRINITY_DN63182_c0_g1_i3.p1 | GH92   | 10.523  | 71.306  | 109.646 |
| TRINITY_DN52879_c0_g1_i1.p1 | GH95   | 0       | 0.485   | 1.443   |
| TRINITY_DN53381_c0_g1_i1.p1 | GH95   | 0.033   | 0.318   | 0.583   |
| TRINITY_DN74921_c0_g1_i1.p1 | GH95   | 0       | 0       | 3.735   |
| TRINITY_DN55020_c0_g1_i1.p1 | GH95   | 0       | 0.829   | 0.02    |
| TRINITY_DN65841_c1_g1_i1.p1 | GH99   | 15.95   | 13.683  | 3.398   |
| TRINITY_DN65926_c0_g2_i4.p1 | PL1    | 0       | 0.15    | 0       |
| TRINITY_DN47246_c0_g1_i1.p1 | PL1    | 0       | 0.309   | 0.819   |
| TRINITY_DN73927_c0_g1_i1.p1 | PL1    | 0       | 0       | 1.433   |
| TRINITY_DN70181_c0_g1_i1.p1 | PL1    | 0       | 0.273   | 0.839   |
| TRINITY_DN65926_c0_g1_i1.p1 | PL1    | 0       | 0.326   | 1.023   |
| TRINITY_DN68668_c4_g4_i1.p1 | PL1    | 0       | 0.009   | 8.944   |
| TRINITY_DN49498_c0_g2_i2.p1 | PL1    | 0       | 0.318   | 0       |
| TRINITY_DN68379_c1_g3_i1.p1 | PL1    | 25.554  | 0.309   | 17.091  |
| TRINITY_DN62274_c0_g1_i1.p1 | PL1    | 57.454  | 232.63  | 142.671 |
| TRINITY_DN66330_c0_g1_i1.p1 | PL10_1 | 1.551   | 0.018   | 12.526  |
| TRINITY_DN70357_c0_g1_i1.p1 | PL14_4 | 0       | 8.522   | 0       |
| TRINITY_DN38077_c0_g1_i1.p2 | PL33_2 | 1.396   | 0       | 0       |



|                             |       |       |   |       |
|-----------------------------|-------|-------|---|-------|
| TRINITY_DN69794_c2_g3_i1.p1 | PL8_3 | 0     | 0 | 4.37  |
| TRINITY_DN33735_c0_g2_i1.p1 | PL9   | 1.108 | 0 | 0     |
| TRINITY_DN614_c0_g2_i1.p1   | PL9_1 | 0     | 0 | 0.757 |

**d *Cononympha leidy***

| Protein ID*                  | GH/PL family | TMM       |           |           |
|------------------------------|--------------|-----------|-----------|-----------|
|                              |              | Library 1 | Library 2 | Library 3 |
| TRINITY_DN35283_c3_g1_i1.p1  | GH1          | 1.02      | 0         | 0         |
| TRINITY_DN30197_c0_g1_i5.p2  | GH105        | 0.019     | 2.801     | 13.597    |
| TRINITY_DN35311_c0_g2_i3.p1  | GH105        | 13.628    | 0.161     | 21.085    |
| TRINITY_DN24233_c0_g1_i1.p1  | GH105        | 0         | 7.689     | 4.965     |
| TRINITY_DN17150_c0_g1_i1.p1  | GH105        | 0         | 1.229     | 0         |
| TRINITY_DN35311_c0_g2_i2.p1  | GH105        | 49.705    | 0.161     | 53.888    |
| TRINITY_DN35311_c0_g5_i1.p1  | GH105        | 0         | 0.282     | 8.448     |
| TRINITY_DN35311_c0_g3_i1.p1  | GH105        | 29.141    | 20.003    | 22.812    |
| TRINITY_DN30197_c0_g1_i2.p1  | GH105        | 22.099    | 0.232     | 1.43      |
| TRINITY_DN29181_c0_g1_i4.p1  | GH11         | 0.204     | 0         | 0.092     |
| TRINITY_DN31544_c1_g4_i1.p2  | GH115        | 0         | 0         | 0.695     |
| TRINITY_DN31544_c1_g1_i1.p1  | GH115        | 0.087     | 14.35     | 2.952     |
| TRINITY_DN25182_c0_g1_i1.p1  | GH120        | 0         | 2.469     | 21.78     |
| TRINITY_DN24938_c0_g1_i3.p1  | GH120        | 0         | 16.063    | 13.505    |
| TRINITY_DN29622_c0_g1_i1.p1  | GH133        | 23.527    | 13.252    | 9.358     |
| TRINITY_DN21054_c0_g1_i1.p2  | GH133        | 0         | 4.756     | 0         |
| TRINITY_DN34793_c0_g1_i5.p1  | GH13_11      | 0.282     | 1.602     | 0         |
| TRINITY_DN30091_c0_g1_i1.p1  | GH13_20      | 23.925    | 0.05      | 0         |
| TRINITY_DN21054_c0_g1_i1.p2  | GH13_25      | 0         | 4.756     | 0         |
| TRINITY_DN15638_c0_g1_i1.p1  | GH13_25      | 0.758     | 0         | 0.153     |
| TRINITY_DN29622_c0_g1_i1.p1  | GH13_25      | 23.527    | 13.252    | 9.358     |
| TRINITY_DN35140_c2_g1_i1.p1  | GH13_3       | 0         | 0.977     | 0         |
| TRINITY_DN35836_c0_g3_i2.p1  | GH13_32      | 33.075    | 31.703    | 19.216    |
| TRINITY_DN35836_c0_g1_i1.p1  | GH13_32      | 3.39      | 10.047    | 23.486    |
| TRINITY_DN22659_c0_g1_i1.p1  | GH13_37      | 2.652     | 8.122     | 2.278     |
| TRINITY_DN30781_c0_g1_i1.p1  | GH13_8       | 74.553    | 137.283   | 222.039   |
| TRINITY_DN27583_c0_g1_i1.p1  | GH158        | 6.479     | 2.539     | 37.706    |
| TRINITY_DN35247_c0_g2_i7.p1  | GH158        | 18.262    | 0         | 2.125     |
| TRINITY_DN35247_c0_g2_i5.p1  | GH158        | 7.548     | 0.695     | 0.858     |
| TRINITY_DN35247_c0_g2_i10.p1 | GH158        | 13.92     | 0         | 2.176     |
| TRINITY_DN35247_c0_g2_i6.p1  | GH158        | 5.148     | 2.711     | 0         |
| TRINITY_DN35218_c0_g1_i3.p1  | GH18         | 118.634   | 187.176   | 407.444   |
| TRINITY_DN32704_c0_g2_i3.p1  | GH18         | 73.786    | 91.462    | 232.377   |
| TRINITY_DN27620_c0_g1_i1.p1  | GH18         | 287.838   | 94.525    | 117.838   |
| TRINITY_DN32704_c0_g1_i2.p1  | GH18         | 98.828    | 114.851   | 142.56    |
| TRINITY_DN35923_c0_g1_i16.p1 | GH18         | 30.249    | 28.791    | 9.521     |
| TRINITY_DN35622_c1_g1_i7.p1  | GH18         | 1332.931  | 410.267   | 383.386   |
| TRINITY_DN35622_c1_g1_i8.p1  | GH18         | 364.586   | 126.893   | 154.768   |
| TRINITY_DN35827_c0_g1_i3.p2  | GH18         | 1.001     | 0.071     | 0         |
| TRINITY_DN31942_c1_g1_i3.p1  | GH18         | 95.943    | 56.433    | 35.632    |
| TRINITY_DN31942_c1_g2_i8.p1  | GH18         | 2933.407  | 3029.338  | 3000.407  |
| TRINITY_DN34102_c0_g1_i1.p1  | GH18         | 0         | 8.898     | 10.798    |
| TRINITY_DN35700_c0_g1_i1.p1  | GH18         | 2439.958  | 1862.376  | 1334.326  |
| TRINITY_DN34800_c0_g2_i5.p1  | GH18         | 19.865    | 70.995    | 0         |
| TRINITY_DN34800_c0_g1_i1.p1  | GH18         | 472.487   | 294.64    | 326.474   |
| TRINITY_DN35622_c1_g2_i1.p2  | GH18         | 1078.984  | 494.695   | 596.874   |

|                              |      |         |         |         |
|------------------------------|------|---------|---------|---------|
| TRINITY_DN34102_c0_g1_i2.p1  | GH18 | 0       | 0.101   | 6.569   |
| TRINITY_DN34102_c0_g1_i4.p1  | GH18 | 0       | 16.537  | 1.512   |
| TRINITY_DN35218_c0_g1_i5.p1  | GH18 | 28.549  | 55.254  | 104.119 |
| TRINITY_DN35622_c1_g3_i1.p1  | GH18 | 151.709 | 98.062  | 109.257 |
| TRINITY_DN34102_c0_g1_i7.p1  | GH18 | 35.912  | 0       | 0.082   |
| TRINITY_DN34800_c0_g2_i1.p1  | GH18 | 105.841 | 76.336  | 133.111 |
| TRINITY_DN34800_c0_g2_i3.p1  | GH18 | 149.116 | 10.45   | 104.599 |
| TRINITY_DN34800_c0_g2_i6.p1  | GH18 | 31.677  | 58.781  | 3.187   |
| TRINITY_DN35608_c0_g1_i7.p1  | GH2  | 6.265   | 31.925  | 67.025  |
| TRINITY_DN35294_c0_g1_i3.p1  | GH2  | 1.583   | 10.964  | 3.616   |
| TRINITY_DN29944_c0_g2_i1.p1  | GH2  | 0.651   | 11.095  | 27.664  |
| TRINITY_DN46631_c0_g1_i1.p1  | GH2  | 0.398   | 0.131   | 0       |
| TRINITY_DN35748_c0_g1_i2.p1  | GH2  | 2.982   | 6.308   | 0       |
| TRINITY_DN35575_c0_g1_i8.p1  | GH2  | 16.688  | 118.741 | 134.051 |
| TRINITY_DN35575_c0_g1_i10.p1 | GH2  | 151.36  | 404.09  | 459.615 |
| TRINITY_DN30567_c0_g1_i1.p1  | GH2  | 18.806  | 24.115  | 7.335   |
| TRINITY_DN28102_c0_g1_i1.p1  | GH20 | 73.319  | 7.699   | 9.163   |
| TRINITY_DN30824_c0_g3_i1.p1  | GH20 | 8.577   | 0.282   | 0       |
| TRINITY_DN30824_c0_g2_i1.p1  | GH20 | 5.479   | 15.086  | 13.045  |
| TRINITY_DN19904_c0_g1_i1.p1  | GH20 | 12.774  | 0       | 0       |
| TRINITY_DN30824_c0_g1_i1.p1  | GH20 | 0.447   | 1.048   | 0       |
| TRINITY_DN31644_c0_g1_i1.p1  | GH20 | 47.627  | 0       | 2.247   |
| TRINITY_DN22702_c0_g1_i1.p1  | GH20 | 5.207   | 0       | 0       |
| TRINITY_DN34327_c0_g1_i7.p1  | GH20 | 3.39    | 0.605   | 0       |
| TRINITY_DN28766_c0_g1_i1.p1  | GH20 | 25.479  | 35.633  | 33.988  |
| TRINITY_DN34327_c0_g1_i6.p1  | GH20 | 18.971  | 18.693  | 9.388   |
| TRINITY_DN34327_c0_g1_i5.p1  | GH20 | 191.021 | 56.624  | 64.155  |
| TRINITY_DN17248_c0_g1_i1.p1  | GH23 | 1.185   | 0       | 0       |
| TRINITY_DN34981_c0_g2_i1.p1  | GH23 | 0       | 0.494   | 0       |
| TRINITY_DN34172_c0_g2_i3.p1  | GH25 | 26.587  | 81.949  | 39.698  |
| TRINITY_DN20806_c0_g1_i1.p1  | GH25 | 2.399   | 0       | 0.286   |
| TRINITY_DN18572_c0_g2_i1.p1  | GH26 | 0.69    | 0       | 0.082   |
| TRINITY_DN16988_c1_g1_i1.p1  | GH26 | 0.359   | 0       | 0.215   |
| TRINITY_DN35998_c0_g1_i2.p1  | GH27 | 18.349  | 6.198   | 5.404   |
| TRINITY_DN35998_c0_g1_i12.p1 | GH27 | 12.579  | 13.786  | 1.778   |
| TRINITY_DN35998_c0_g1_i9.p1  | GH27 | 6.479   | 0       | 4.331   |
| TRINITY_DN35998_c0_g1_i6.p1  | GH27 | 50.91   | 26.211  | 64.604  |
| TRINITY_DN35998_c0_g1_i5.p1  | GH27 | 0.029   | 0.05    | 8.367   |
| TRINITY_DN43042_c0_g1_i2.p1  | GH28 | 0       | 0       | 0.419   |
| TRINITY_DN29897_c0_g1_i1.p1  | GH3  | 0.029   | 8.566   | 2.717   |
| TRINITY_DN32853_c0_g1_i1.p1  | GH3  | 0.69    | 0       | 0       |
| TRINITY_DN18756_c0_g1_i1.p1  | GH3  | 0       | 0       | 1.236   |
| TRINITY_DN33009_c0_g1_i2.p1  | GH3  | 87.463  | 103.645 | 135.552 |
| TRINITY_DN30451_c4_g2_i1.p1  | GH3  | 0       | 6.087   | 0.47    |
| TRINITY_DN35358_c0_g1_i4.p1  | GH3  | 20.953  | 12.345  | 14.098  |
| TRINITY_DN35358_c0_g1_i3.p1  | GH3  | 13.386  | 17.827  | 20.942  |
| TRINITY_DN35358_c0_g1_i1.p1  | GH3  | 22.487  | 21.757  | 22.321  |
| TRINITY_DN35358_c0_g1_i2.p1  | GH3  | 0       | 0       | 12.994  |
| TRINITY_DN20856_c0_g1_i2.p2  | GH3  | 0       | 1.451   | 0       |
| TRINITY_DN19322_c0_g2_i1.p1  | GH3  | 0.69    | 1.26    | 21.198  |
| TRINITY_DN31036_c0_g1_i1.p1  | GH3  | 109.727 | 119.97  | 85.71   |
| TRINITY_DN28846_c0_g1_i1.p1  | GH3  | 19.641  | 0       | 2.125   |

|                              |        |         |         |         |
|------------------------------|--------|---------|---------|---------|
| TRINITY_DN22425_c0_g3_i1.p1  | GH3    | 0       | 0       | 0.756   |
| TRINITY_DN8878_c0_g1_i1.p2   | GH3    | 0.962   | 0       | 0       |
| TRINITY_DN22425_c0_g1_i1.p1  | GH3    | 0       | 0       | 0.93    |
| TRINITY_DN34328_c0_g1_i3.p1  | GH3    | 13.502  | 163.927 | 255.556 |
| TRINITY_DN34328_c0_g2_i1.p1  | GH3    | 70.59   | 8.052   | 30.208  |
| TRINITY_DN33719_c0_g1_i1.p1  | GH3    | 81.586  | 29.355  | 42.048  |
| TRINITY_DN35599_c0_g2_i1.p1  | GH30_1 | 88.599  | 3.85    | 11.156  |
| TRINITY_DN35599_c0_g2_i7.p1  | GH30_1 | 75.728  | 14.018  | 20.82   |
| TRINITY_DN31778_c0_g1_i1.p1  | GH30_1 | 0.194   | 16.134  | 0.215   |
| TRINITY_DN31732_c0_g1_i2.p1  | GH30_1 | 33.804  | 78.744  | 255.842 |
| TRINITY_DN34412_c0_g1_i3.p1  | GH30_1 | 408.764 | 335.604 | 348.387 |
| TRINITY_DN32602_c0_g2_i1.p1  | GH30_1 | 3.497   | 0.302   | 12.157  |
| TRINITY_DN32602_c0_g3_i1.p1  | GH30_1 | 106.754 | 71.257  | 134.224 |
| TRINITY_DN35599_c0_g2_i6.p1  | GH30_1 | 42.653  | 19.238  | 0       |
| TRINITY_DN35599_c0_g2_i2.p1  | GH30_1 | 0       | 11.256  | 6.375   |
| TRINITY_DN35444_c2_g4_i1.p1  | GH30_1 | 181.579 | 171.455 | 62.398  |
| TRINITY_DN32602_c0_g1_i2.p1  | GH30_1 | 122.073 | 117.259 | 83.381  |
| TRINITY_DN35695_c0_g1_i11.p1 | GH31   | 2.428   | 9.563   | 0       |
| TRINITY_DN32897_c0_g1_i1.p1  | GH31   | 9.218   | 51.485  | 27.204  |
| TRINITY_DN35695_c0_g1_i5.p1  | GH31   | 0       | 2.056   | 0.112   |
| TRINITY_DN32897_c0_g1_i2.p1  | GH31   | 0.029   | 0       | 13.178  |
| TRINITY_DN35695_c0_g3_i2.p1  | GH31   | 14.541  | 19.268  | 8.367   |
| TRINITY_DN32897_c0_g1_i4.p1  | GH31   | 0       | 0       | 0       |
| TRINITY_DN26538_c0_g1_i1.p1  | GH31   | 13.065  | 11.549  | 20.493  |
| TRINITY_DN31620_c0_g2_i3.p1  | GH31   | 0.991   | 18.935  | 99.756  |
| TRINITY_DN31620_c0_g1_i4.p1  | GH31   | 3.235   | 8.011   | 3.259   |
| TRINITY_DN26777_c0_g1_i1.p1  | GH31   | 2.079   | 20.326  | 7.764   |
| TRINITY_DN31620_c0_g1_i3.p1  | GH31   | 42.896  | 20.296  | 39.32   |
| TRINITY_DN31620_c0_g1_i14.p1 | GH31   | 13.454  | 38.294  | 15.16   |
| TRINITY_DN31620_c0_g1_i1.p1  | GH31   | 3.623   | 43.715  | 2.033   |
| TRINITY_DN35708_c0_g1_i2.p1  | GH31   | 5.799   | 23.127  | 14.935  |
| TRINITY_DN36073_c0_g3_i1.p1  | GH31   | 0.078   | 0.796   | 15.16   |
| TRINITY_DN25746_c0_g1_i1.p1  | GH31   | 5.887   | 5.653   | 3.392   |
| TRINITY_DN28930_c0_g1_i1.p1  | GH31   | 1.282   | 0.927   | 10.379  |
| TRINITY_DN25737_c0_g1_i1.p1  | GH31   | 45.509  | 45.902  | 39.678  |
| TRINITY_DN22312_c0_g1_i1.p1  | GH31   | 8.043   | 0       | 9.133   |
| TRINITY_DN24862_c0_g3_i1.p2  | GH31   | 1.02    | 0       | 0       |
| TRINITY_DN35947_c1_g1_i9.p1  | GH35   | 0.068   | 0.897   | 1.093   |
| TRINITY_DN35947_c1_g1_i11.p1 | GH35   | 25.285  | 18.542  | 10.062  |
| TRINITY_DN35947_c1_g1_i4.p1  | GH35   | 32.366  | 59.426  | 49.996  |
| TRINITY_DN35947_c1_g1_i10.p1 | GH35   | 21.691  | 61.26   | 46.543  |
| TRINITY_DN35863_c0_g1_i4.p1  | GH35   | 76.855  | 7.689   | 35.142  |
| TRINITY_DN35863_c0_g1_i13.p1 | GH35   | 31.094  | 0.423   | 1.011   |
| TRINITY_DN35863_c0_g1_i12.p1 | GH35   | 5.459   | 13.997  | 1.89    |
| TRINITY_DN32301_c0_g2_i1.p1  | GH35   | 73.29   | 11.942  | 0.776   |
| TRINITY_DN31253_c0_g1_i2.p1  | GH35   | 85.044  | 46.759  | 28.737  |
| TRINITY_DN29615_c0_g1_i1.p1  | GH35   | 5.848   | 2.62    | 6.773   |
| TRINITY_DN31921_c0_g1_i1.p1  | GH36   | 22.196  | 44.612  | 15.181  |
| TRINITY_DN33415_c0_g1_i1.p1  | GH36   | 4.585   | 2.207   | 1.257   |
| TRINITY_DN31288_c1_g6_i1.p1  | GH4    | 0.865   | 1.159   | 0       |
| TRINITY_DN20634_c0_g1_i1.p2  | GH4    | 1.496   | 0       | 0       |
| TRINITY_DN3433_c0_g1_i1.p2   | GH42   | 0.641   | 0       | 0       |

|                             |         |          |         |         |
|-----------------------------|---------|----------|---------|---------|
| TRINITY_DN43544_c0_g1_i1.p1 | GH42    | 0.797    | 0       | 0       |
| TRINITY_DN34694_c0_g1_i2.p1 | GH43_2  | 5.916    | 11.145  | 0.96    |
| TRINITY_DN34694_c0_g1_i5.p1 | GH43_2  | 6.246    | 8.354   | 9.96    |
| TRINITY_DN34694_c0_g3_i1.p1 | GH43_2  | 0.359    | 4.817   | 22.638  |
| TRINITY_DN34694_c0_g4_i1.p2 | GH43_2  | 312.725  | 661.746 | 683.963 |
| TRINITY_DN23320_c0_g1_i2.p1 | GH43_2  | 0        | 0       | 1.522   |
| TRINITY_DN33036_c0_g1_i1.p1 | GH43_28 | 142.316  | 11.911  | 32.66   |
| TRINITY_DN33036_c0_g2_i2.p1 | GH43_28 | 6.265    | 7.387   | 2.922   |
| TRINITY_DN32597_c1_g1_i1.p1 | GH43_28 | 177.033  | 37.336  | 30.586  |
| TRINITY_DN28886_c0_g1_i2.p1 | GH45    | 0.165    | 0       | 21.034  |
| TRINITY_DN10879_c0_g1_i1.p1 | GH45    | 0.408    | 0.101   | 0       |
| TRINITY_DN23777_c0_g1_i1.p1 | GH47    | 11.715   | 0       | 0       |
| TRINITY_DN43831_c0_g1_i1.p1 | GH5     | 0.223    | 0.393   | 0.133   |
| TRINITY_DN33803_c1_g1_i1.p1 | GH53    | 180.239  | 32.489  | 78.303  |
| TRINITY_DN33803_c0_g1_i1.p1 | GH53    | 0        | 3.829   | 0       |
| TRINITY_DN34529_c0_g1_i1.p1 | GH55    | 1070.902 | 564.732 | 278.593 |
| TRINITY_DN22003_c1_g2_i1.p1 | GH55    | 0        | 1.129   | 0.072   |
| TRINITY_DN3463_c0_g1_i1.p1  | GH5_1   | 0.223    | 0.191   | 0       |
| TRINITY_DN23372_c0_g1_i1.p1 | GH5_1   | 0.515    | 0.131   | 2.544   |
| TRINITY_DN29816_c0_g1_i1.p1 | GH5_1   | 13.648   | 2.005   | 10.849  |
| TRINITY_DN23480_c0_g1_i1.p1 | GH5_1   | 0.117    | 69.634  | 17.888  |
| TRINITY_DN29380_c0_g1_i1.p1 | GH5_1   | 22.041   | 38.677  | 38.38   |
| TRINITY_DN43258_c0_g1_i1.p1 | GH5_1   | 0.427    | 0.161   | 0.112   |
| TRINITY_DN47092_c0_g1_i1.p1 | GH5_1   | 0.651    | 0.121   | 0.031   |
| TRINITY_DN47172_c0_g1_i1.p1 | GH5_1   | 0.233    | 0       | 0.184   |
| TRINITY_DN23372_c0_g1_i3.p1 | GH5_1   | 0        | 0       | 6.099   |
| TRINITY_DN15218_c0_g1_i1.p1 | GH5_2   | 0        | 2.791   | 0       |
| TRINITY_DN43534_c0_g1_i1.p1 | GH5_2   | 0.418    | 0       | 0.245   |
| TRINITY_DN19972_c0_g2_i1.p1 | GH5_2   | 0.777    | 0.302   | 0.306   |
| TRINITY_DN38224_c0_g1_i1.p1 | GH5_2   | 1.583    | 0.464   | 0.153   |
| TRINITY_DN23628_c0_g1_i2.p1 | GH5_2   | 0.729    | 0       | 0.184   |
| TRINITY_DN31229_c0_g1_i2.p1 | GH5_4   | 8.781    | 0       | 23.476  |
| TRINITY_DN31229_c0_g2_i1.p1 | GH5_4   | 755.118  | 251.499 | 324.042 |
| TRINITY_DN20848_c0_g1_i1.p1 | GH63    | 9.801    | 0       | 0       |
| TRINITY_DN16324_c0_g1_i1.p1 | GH63    | 0        | 0       | 1.686   |
| TRINITY_DN19431_c0_g1_i1.p1 | GH67    | 14.648   | 15.136  | 6.65    |
| TRINITY_DN7541_c0_g1_i1.p1  | GH7     | 0.884    | 0.071   | 0.102   |
| TRINITY_DN34169_c0_g1_i1.p1 | GH7     | 0.253    | 0.584   | 0       |
| TRINITY_DN36016_c1_g2_i1.p1 | GH7     | 1.758    | 0       | 0.194   |
| TRINITY_DN36016_c0_g1_i1.p1 | GH7     | 0        | 1.945   | 0.031   |
| TRINITY_DN36016_c1_g4_i2.p1 | GH7     | 2.098    | 0       | 0       |
| TRINITY_DN36016_c1_g3_i3.p1 | GH7     | 0.719    | 0       | 0       |
| TRINITY_DN34169_c0_g1_i3.p1 | GH7     | 0        | 1.219   | 0.419   |
| TRINITY_DN36016_c1_g1_i5.p1 | GH7     | 2.584    | 0       | 0.276   |
| TRINITY_DN10453_c0_g1_i1.p1 | GH7     | 0.282    | 0       | 0.327   |
| TRINITY_DN31592_c0_g2_i1.p1 | GH7     | 0        | 0       | 5.741   |
| TRINITY_DN33576_c1_g5_i1.p1 | GH7     | 17.29    | 28.68   | 116.418 |
| TRINITY_DN30829_c0_g2_i2.p1 | GH7     | 7.178    | 6.631   | 15.875  |
| TRINITY_DN31592_c0_g6_i1.p1 | GH7     | 9.51     | 30.544  | 15.129  |
| TRINITY_DN31509_c2_g1_i1.p1 | GH7     | 1.962    | 0.383   | 0.368   |
| TRINITY_DN34169_c0_g2_i1.p1 | GH7     | 0.719    | 0       | 0.143   |
| TRINITY_DN33008_c0_g1_i1.p1 | GH7     | 7.79     | 53.793  | 176.313 |

|                             |      |          |          |          |
|-----------------------------|------|----------|----------|----------|
| TRINITY_DN34169_c0_g3_i3.p1 | GH7  | 0.039    | 1.119    | 0        |
| TRINITY_DN21835_c0_g1_i1.p1 | GH7  | 0.301    | 1.985    | 0.123    |
| TRINITY_DN18146_c0_g1_i1.p1 | GH7  | 0.418    | 0        | 0        |
| TRINITY_DN34169_c0_g3_i1.p1 | GH7  | 0.835    | 0.111    | 0.153    |
| TRINITY_DN31592_c0_g1_i5.p1 | GH7  | 0        | 2.812    | 0.072    |
| TRINITY_DN17617_c1_g1_i1.p1 | GH7  | 34.358   | 43.171   | 21.616   |
| TRINITY_DN17617_c0_g1_i1.p1 | GH7  | 0.34     | 0.242    | 0.163    |
| TRINITY_DN15665_c0_g1_i1.p1 | GH7  | 0.398    | 0.101    | 0.398    |
| TRINITY_DN12633_c0_g1_i1.p1 | GH7  | 1.049    | 0.171    | 0.112    |
| TRINITY_DN31509_c3_g1_i1.p1 | GH7  | 29.559   | 38.798   | 156.382  |
| TRINITY_DN32666_c0_g1_i2.p1 | GH7  | 55.485   | 544.708  | 1061.443 |
| TRINITY_DN34793_c0_g1_i5.p1 | GH77 | 0.282    | 1.602    | 0        |
| TRINITY_DN14565_c0_g1_i1.p1 | GH8  | 1.039    | 0.514    | 0.174    |
| TRINITY_DN35856_c0_g2_i2.p1 | GH81 | 1071.864 | 1128.366 | 268.081  |
| TRINITY_DN31204_c0_g1_i1.p1 | GH87 | 17.3     | 12.204   | 11.339   |
| TRINITY_DN29761_c0_g1_i1.p1 | GH87 | 3.798    | 0        | 0.827    |
| TRINITY_DN31107_c0_g1_i2.p1 | GH87 | 0.01     | 8.022    | 9.072    |
| TRINITY_DN30030_c0_g1_i2.p1 | GH87 | 66.976   | 265.678  | 104.078  |
| TRINITY_DN40222_c0_g1_i1.p1 | GH9  | 0.777    | 0        | 0        |
| TRINITY_DN33511_c0_g1_i2.p1 | GH9  | 14.007   | 8.576    | 9.817    |
| TRINITY_DN35100_c0_g2_i4.p1 | GH92 | 337.669  | 516.18   | 234.941  |
| TRINITY_DN32767_c0_g2_i1.p1 | GH92 | 98.604   | 32.439   | 19.451   |
| TRINITY_DN35100_c0_g3_i1.p1 | GH92 | 19.428   | 0        | 0        |
| TRINITY_DN24526_c0_g1_i1.p1 | GH92 | 2.7      | 0.05     | 0        |
| TRINITY_DN35100_c0_g1_i1.p1 | GH92 | 49.054   | 17.121   | 39.341   |
| TRINITY_DN35100_c0_g1_i2.p2 | GH92 | 0        | 0        | 8.479    |
| TRINITY_DN25566_c0_g1_i1.p1 | GH94 | 2.215    | 0        | 0        |
| TRINITY_DN24938_c0_g1_i3.p1 | GH95 | 0        | 16.063   | 13.505   |
| TRINITY_DN30910_c0_g1_i2.p1 | GH95 | 63.149   | 33.507   | 41.292   |
| TRINITY_DN25182_c0_g1_i1.p1 | GH95 | 0        | 2.469    | 21.78    |
| TRINITY_DN29791_c0_g1_i1.p1 | GH95 | 68.579   | 88.721   | 83.105   |
| TRINITY_DN34774_c0_g1_i1.p1 | GH95 | 83.014   | 129.292  | 72.368   |
| TRINITY_DN34774_c0_g1_i2.p1 | GH95 | 0.146    | 7.901    | 12.627   |
| TRINITY_DN34724_c0_g1_i3.p1 | GH95 | 60.303   | 33.195   | 20.85    |
| TRINITY_DN25759_c0_g1_i1.p1 | GH99 | 15.503   | 5.25     | 12.238   |
| TRINITY_DN35240_c1_g1_i1.p1 | PL1  | 33.299   | 14.431   | 9.725    |
| TRINITY_DN31733_c0_g1_i3.p1 | PL1  | 375.942  | 229.38   | 460.177  |
| TRINITY_DN35240_c1_g3_i1.p1 | PL1  | 707.53   | 176.957  | 587.046  |
| TRINITY_DN27089_c0_g1_i2.p1 | PL1  | 0.243    | 0.846    | 43.049   |
| TRINITY_DN35240_c0_g1_i7.p1 | PL1  | 26.315   | 11.075   | 46.247   |
| TRINITY_DN35240_c0_g1_i3.p1 | PL1  | 422.422  | 311.157  | 459.82   |
| TRINITY_DN22653_c0_g1_i1.p1 | PL1  | 0        | 0        | 10.144   |
| TRINITY_DN24299_c0_g1_i1.p1 | PL1  | 71.726   | 23.41    | 74.258   |
| TRINITY_DN35240_c0_g1_i2.p1 | PL1  | 24.032   | 15.076   | 110.32   |
| TRINITY_DN35240_c0_g2_i3.p1 | PL1  | 610.189  | 155.916  | 522.064  |
| TRINITY_DN24682_c0_g1_i1.p1 | PL1  | 51.434   | 10.954   | 35.97    |
